# Supplementary material for: Estimating the Population Size of Female Sex Workers in Zimbabwe: Comparison of Estimates Obtained Using Different Methods in Twenty Sites and Development of a National-Level Estimate
Source: PubMed Central journal article supplement (PMC7417013; doi:10.1097/qai.0000000000002393), 2020-05-05

## Appendix 1: Assessments of site-based PSE's

### Rationale and Methods

Each population size estimation method makes a number of assumptions, as does respondent driven sampling(1, 2). Some of these assumptions can be investigated for possible biases in the estimate of P (proportion attending clinic or receiving a wristband in the RDS surveys) and implications for the PSE qualitatively assessed. For multiplier methods, the two data sources are assumed to be independent. In the case of the service multiplier method (SMM), this means that women attending the programme should not disproportionately have been more likely to be recruited into the survey, and for the unique object multiplier method (UOMM), that the process of distributing wristbands was independent of survey recruitment. While we made efforts to keep these processes separate (e.g. not recruiting seeds based on programme attendance or distributing wristbands directly to RDS seeds) we graphically examined the convergence of the estimate that measured programme attendance or wristband receipt in the RDS survey over sample accumulation to judge whether there was evidence that the final estimate was likely still dependent on seed characteristics or whether the estimate appeared to have stabilized prior to final sample size ('reasonable convergence'). If the estimate had not converged, this could also have indicated that it was too low or high(3) and therefore that our resulting PSE was too high or too low. We also examined recruitment homophily by programme attendance and wristband receipt (the tendency for women to recruit others like themselves on the basis of a given characteristic) and the ratio of the mean network size of those who did attend or receive a wristband to those who did not, a difference that is accounted for in the weighting but which explains a discrepancy between the unweighted and weighted findings.

Capture-recapture methods assume the 'captures' are independent from each other which is difficult to ensure or assess in practice, and assumes limited mobility of FSW to and from the site between captures. The census methods assume that women counted at sites are indeed sex workers.

We used the RDS package(4, 5) for R statistical software version 3.3.2.(5)

# Findings

## Convergence plots

### Site 1

#### SMM (Attended Sisters)

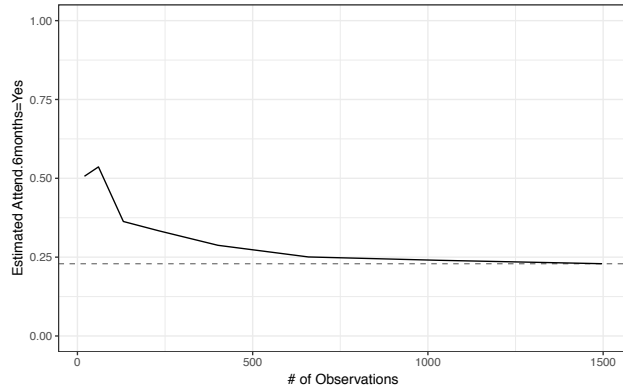

### Site 2

#### SMM (Attended Sisters)

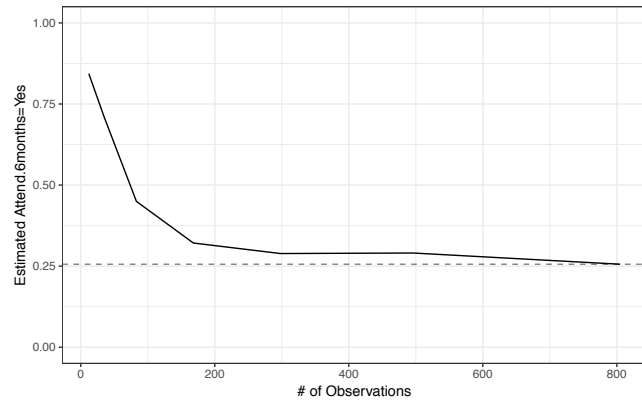

#### UOMM (Received Wristband)

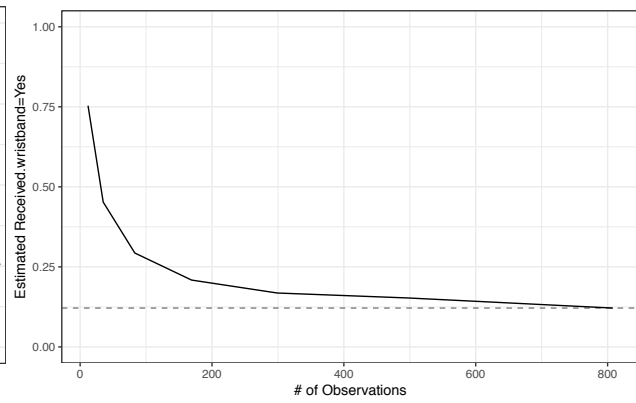

### Site 3

#### SMM (Attended Sisters)

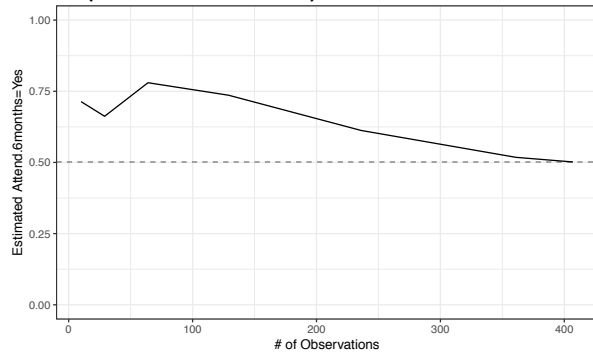

### Site 4

#### SMM (Attended Sisters)

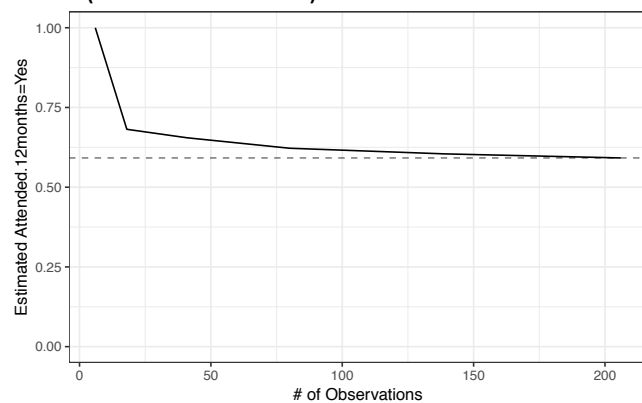

#### UOMM (Received Wristband)

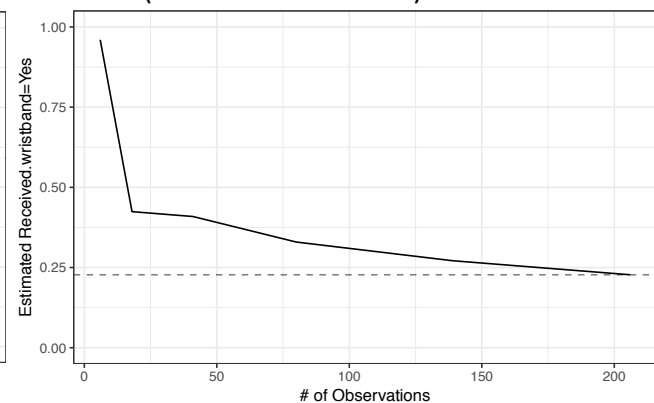

### Site 5

#### SMM (Attended Sisters)

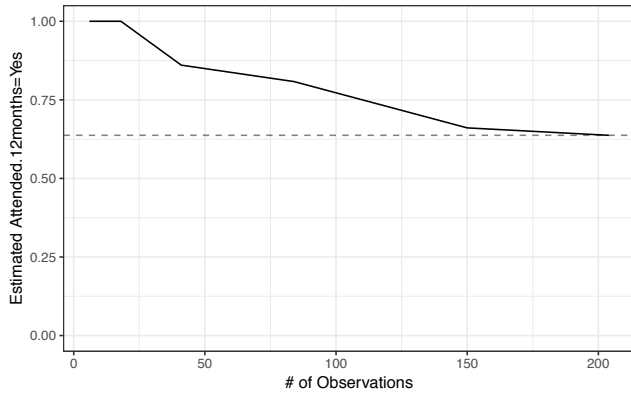

#### UOMM (Received Wristband)

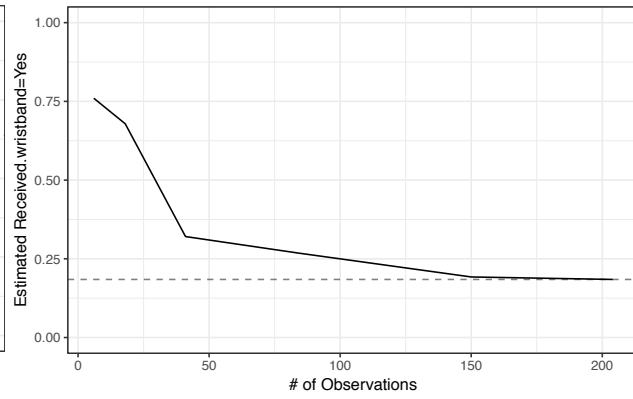

### Site 6

#### SMM (Attended Sisters)

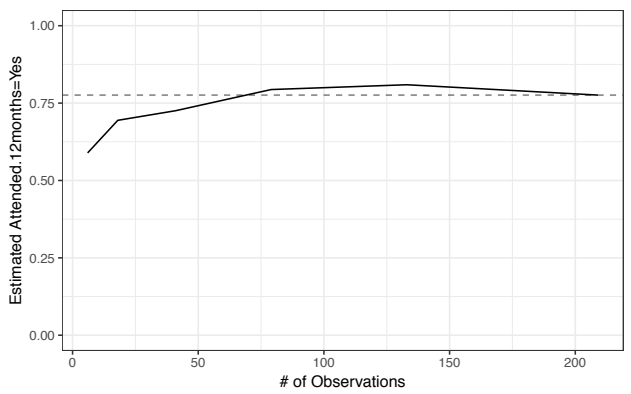

#### UOMM (Received Wristband)

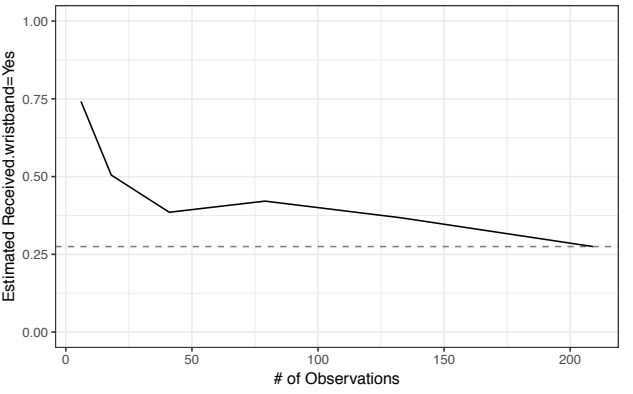

### Site 7

#### SMM (Attended Sisters)

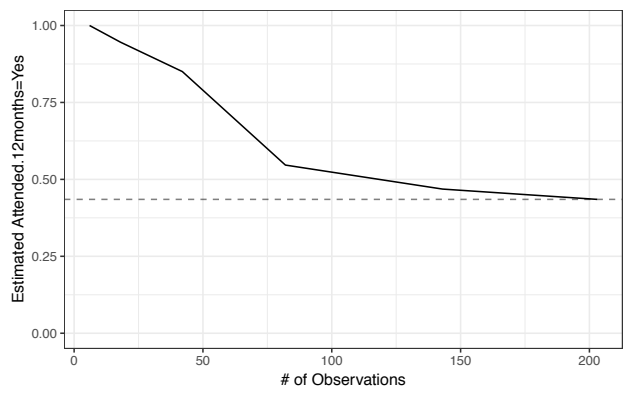

#### UOMM (Received Wristband)

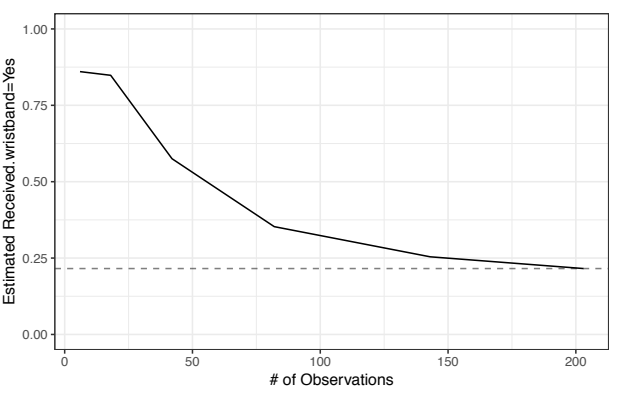

### Site 8

#### SMM (Attended Sisters)

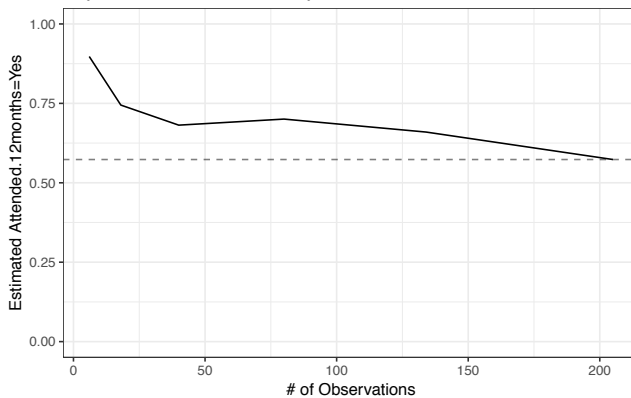

#### UOMM (Received Wristband)

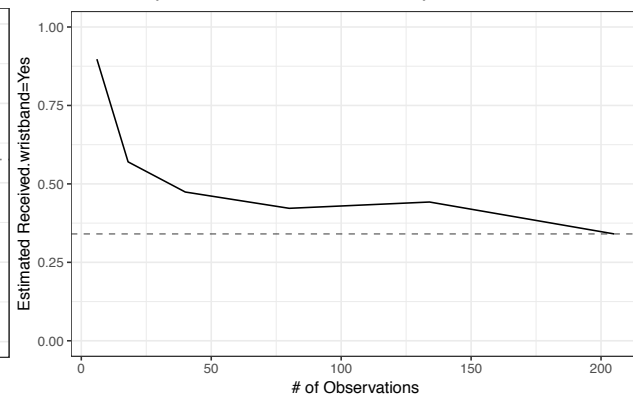

### Site 9

#### SMM (Attended Sisters)

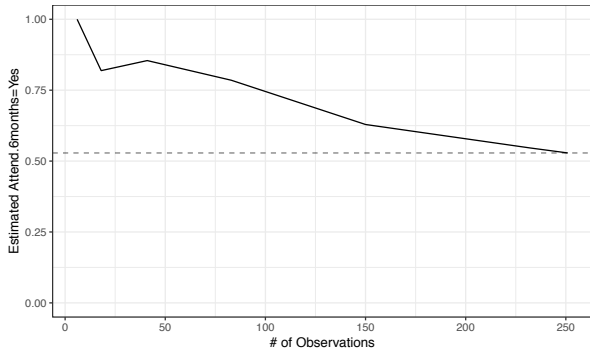

### Site 10

#### SMM (Attended Sisters)

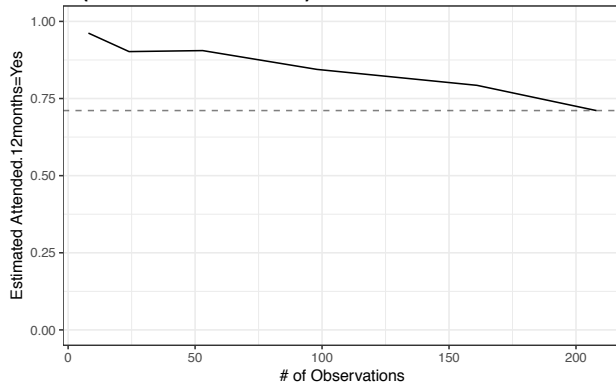

#### UOMM (Received Wristband)

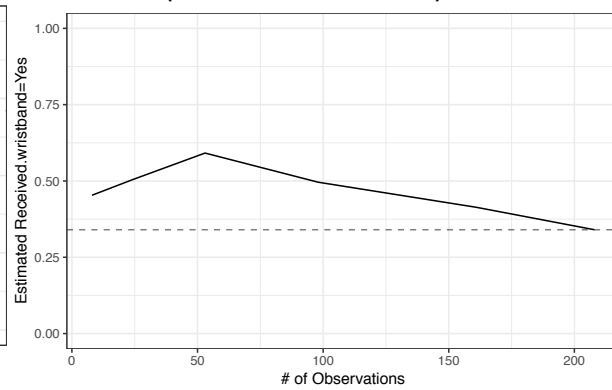

### Site 11

#### UOMM (Received Wristband)

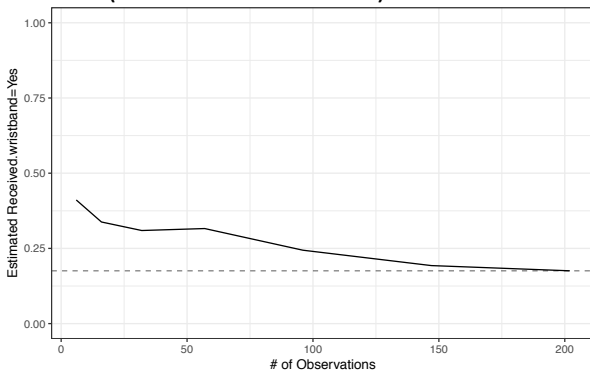

### Site 12

#### SMM (Attended Sisters)

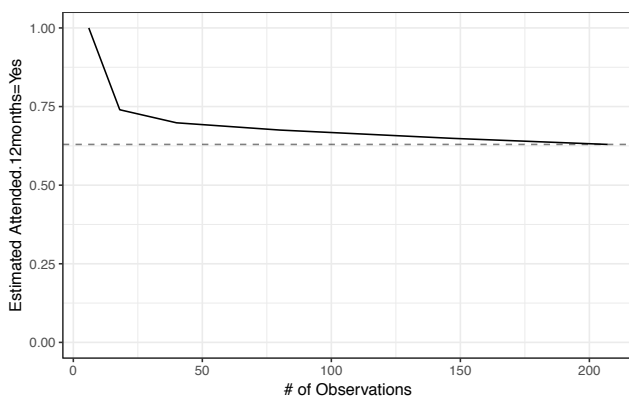

#### UOMM (Received Wristband)

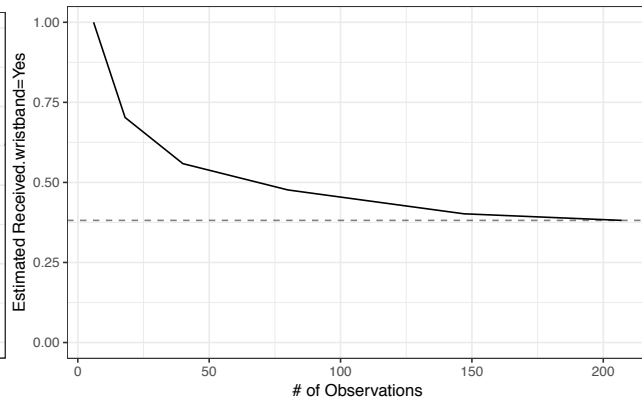

### Site 13

#### SMM (Attended Sisters)

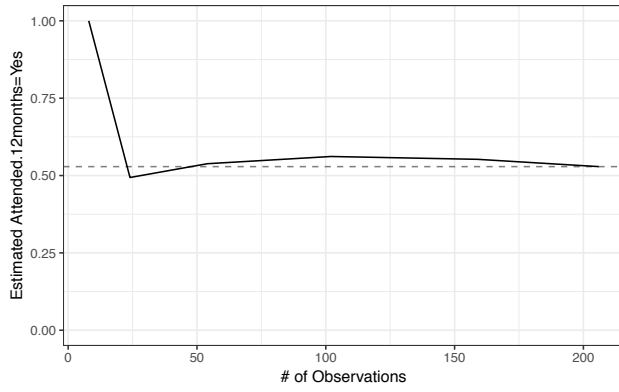

#### UOMM (Received Wristband)

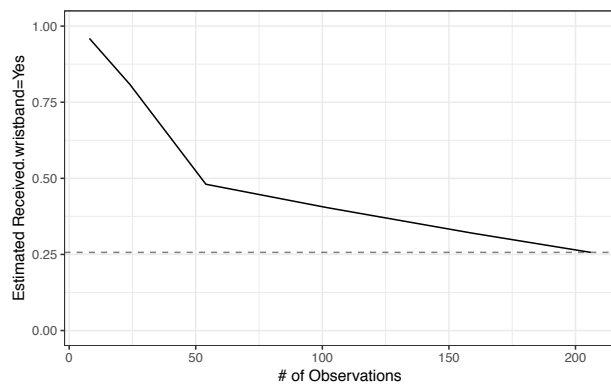

### Site 14

#### SMM (Attended Sisters)

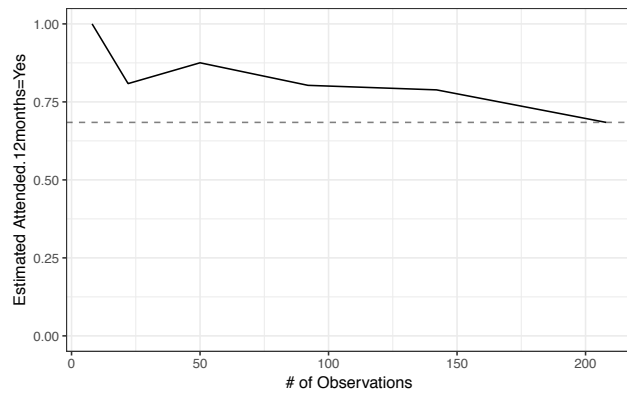

#### UOMM (Received Wristband)

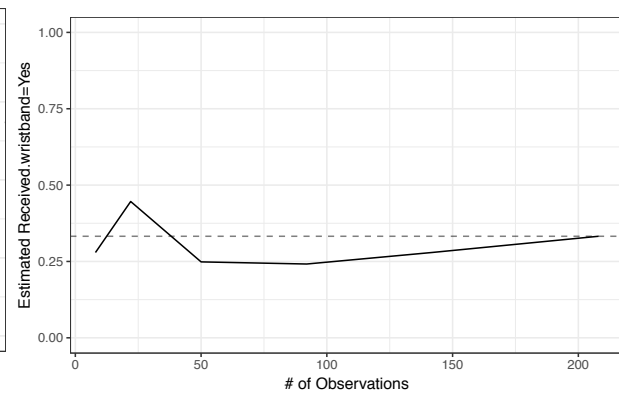

### Site 15

#### SMM (Attended Sisters)

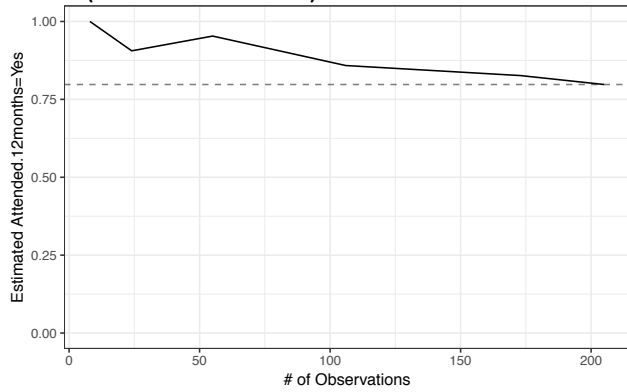

#### UOMM (Received Wristband)

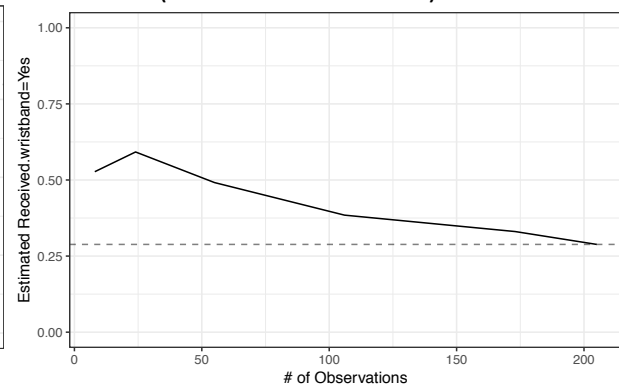

### Site 16

#### SMM (Attended Sisters)

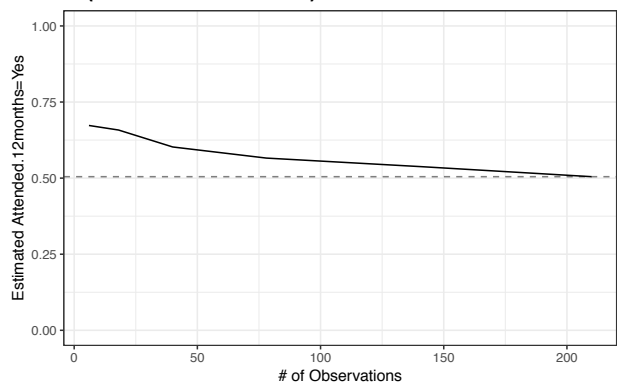

#### UOMM (Received Wristband)

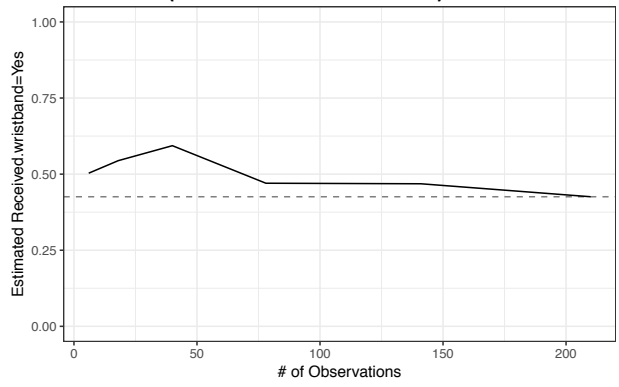

### Site 17

#### SMM (Attended Sisters)

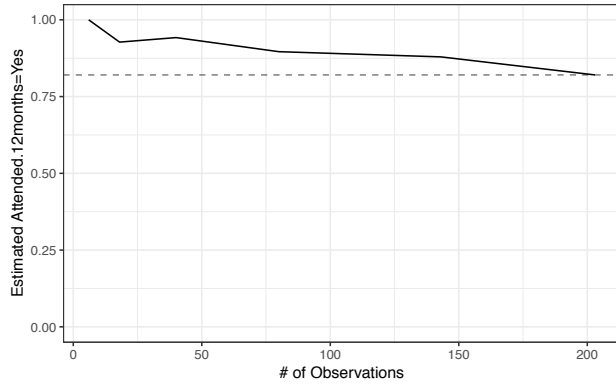

#### UOMM (Received Wristband)

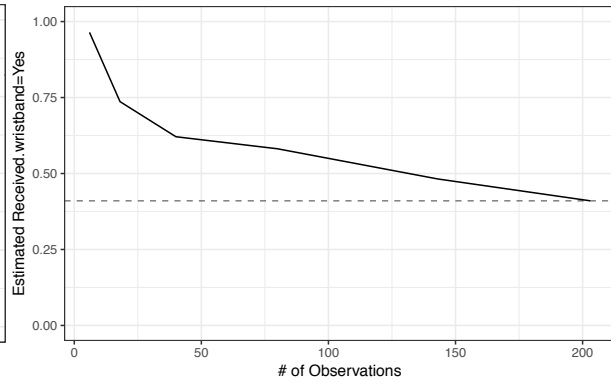

### Site 18

#### SMM (Attended Sisters)

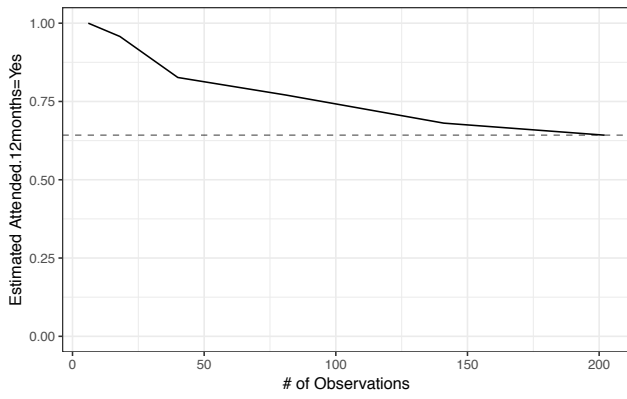

#### UOMM (Received Wristband)

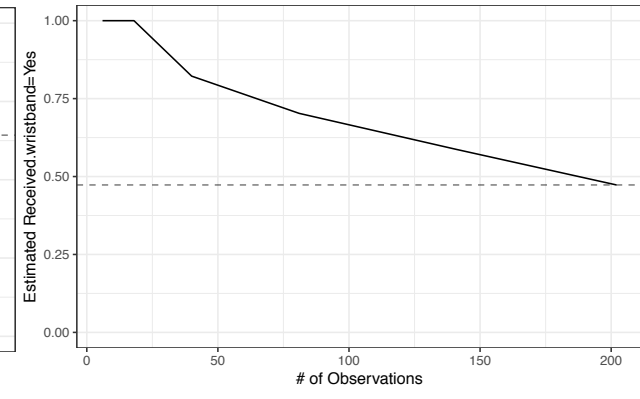

### Site 19

#### SMM (Attended Sisters)

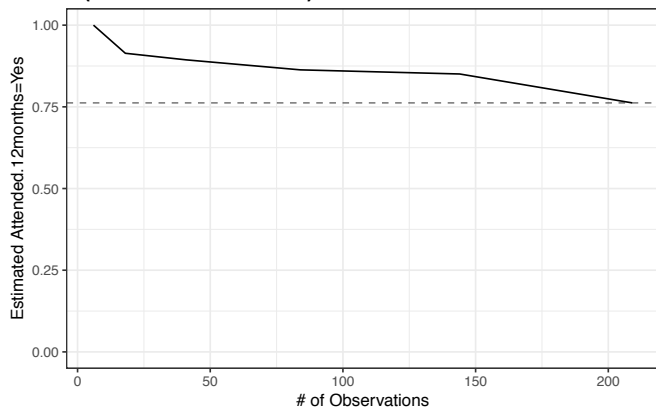

#### UOMM (Received Wristband)

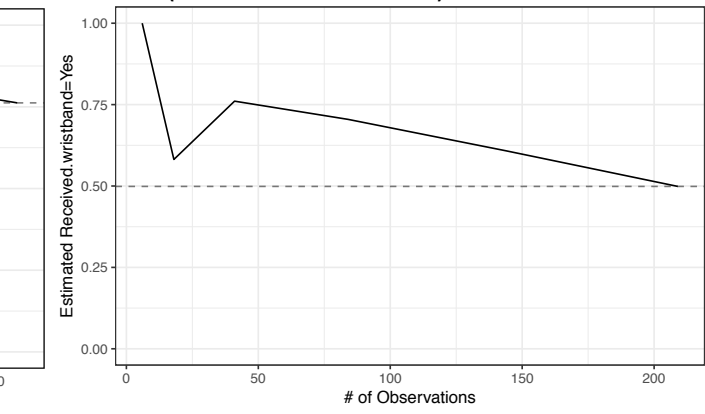

**Table 1: Assessment of Estimators from RDS Surveys used in the Service Multiplier and Unique Object Multiplier Site PSE Methods**

| Site | SMM                                      |                                               |                                                                                 | UOMM                                        |                                                       |                                                                                             |
|------|------------------------------------------|-----------------------------------------------|---------------------------------------------------------------------------------|---------------------------------------------|-------------------------------------------------------|---------------------------------------------------------------------------------------------|
|      | Convergence of Attended Clinic Estimator | Recruitment homophily by attendance at clinic | Differential activity: ratio of mean degree of those attending to not attending | Convergence of Received Wristband estimator | Recruitment homophily by whether received a wristband | Differential activity: ratio of mean degree of those receiving to not receiving a wristband |
| 1    | Good convergence                         | 1.10                                          | 1.35                                                                            | n/a                                         |                                                       |                                                                                             |
| 2    | Good convergence                         | 1.16                                          | 0.98                                                                            | Good convergence                            | 1.10                                                  | 1.93                                                                                        |
| 3    | Estimate potentially high                | 1.14                                          | 1.22                                                                            | n/a                                         |                                                       |                                                                                             |
| 4    | Good convergence                         | 1.09                                          | 1.31                                                                            | Satisfactory convergence                    | 1.21                                                  | 0.99                                                                                        |
| 5    | Satisfactory convergence                 | 1.02                                          | 1.46                                                                            | Good convergence                            | 1.06                                                  | 1.36                                                                                        |
| 6    | Good convergence                         | 1.04                                          | 1.10                                                                            | Estimate potentially high                   | 1.30                                                  | 1.08                                                                                        |
| 8    | Estimate potentially high                | 1.05                                          | 1.29                                                                            | Estimate potentially high                   | 1.27                                                  | 1.00                                                                                        |
| 9    | Estimate potentially high                | 1.01                                          | 1.50                                                                            | Estimate potentially high                   | 1.13                                                  | 0.97                                                                                        |
| 9    | Estimate potentially high                | 1.08                                          | 1.16                                                                            | n/a                                         |                                                       |                                                                                             |
| 10   | Estimate potentially high                | 1.07                                          | 1.02                                                                            | Estimate potentially high                   | 1.21                                                  | 1.09                                                                                        |
| 11   | n/a                                      |                                               |                                                                                 | Good convergence                            | 1.01                                                  | 1.39                                                                                        |
| 12   | Good convergence                         | 1.09                                          | 1.20                                                                            | Good convergence                            | 1.28                                                  | 1.19                                                                                        |
| 13   | Good convergence                         | 1.00                                          | 1.02                                                                            | Satisfactory convergence                    | 1.25                                                  | 0.91                                                                                        |
| 14   | Estimate potentially high                | 0.98                                          | 1.31                                                                            | Good convergence                            | 1.12                                                  | 0.97                                                                                        |
| 14   | Satisfactory convergence                 | 1.17                                          | 1.50                                                                            | Satisfactory convergence                    | 1.21                                                  | 1.67                                                                                        |
| 15   | Satisfactory convergence                 | 1.03                                          | 1.28                                                                            | Estimate potentially high                   | 1.20                                                  | 1.43                                                                                        |
| 16   | Satisfactory convergence                 | 1.13                                          | 1.21                                                                            | Satisfactory convergence                    | 1.40                                                  | 0.91                                                                                        |
| 17   | Estimate potentially high                | 1.02                                          | 1.01                                                                            | Estimate potentially high                   | 1.40                                                  | 1.16                                                                                        |
| 18   | Satisfactory convergence                 | 1.17                                          | 1.22                                                                            | Estimate potentially high                   | 1.15                                                  | 1.18                                                                                        |
| 20   | n/a                                      |                                               |                                                                                 | n/a                                         |                                                       |                                                                                             |
|      | <b>Mean:</b>                             | 1.07                                          | 1.23                                                                            | <b>Mean:</b>                                | 1.21                                                  | 1.20                                                                                        |

\*Recruitment homophily refers to the tendency for participants in the survey to recruit others who are like themselves on the characteristics of interest. A measure of 1 refers to similarity as would be expected by chance, negative numbers to dissimilarity and measures > 1 to similarity.

1. Guidelines on Estimating the Size of Populations Most at Risk to HIV. Geneva: World Health Organisation and UNAIDS; 2010.
2. Gile KJ, Handcock MS. Respondent-Driven Sampling: An Assessment of Current Methodology. *Sociol Methodol.* 2010;40(1):285-327.
3. Gile KJ, Johnson LG, Salganik MJ. Diagnostics for respondent driven sampling. *Journal of the Royal Statistical Society: Series A.* 2014.
4. MS. H, IE. F, KJ. G. RDS: respondent-driven sampling, Version 0.7-8. Project home page at <http://hpmrg.org/>, <http://cran.r-project.org/package=RDS.2016> [
5. R Core team. R: A language and environment for statistical computing. R Foundation for Statistical Computing, Vienna, Austria. URL <http://www.r-project.org/>. 2015.



## Appendix 2: RDS Survey questions used for individual site unique object and service multiplier method estimates

### Service Multiplier Method: Sisters with a Voice attendance **2016 Surveys**

Have you ever heard of the Sisters with a Voice programme?

0 No

1 Yes

999 I don't wish to answer

In the past 12 months have you attended the Sisters with a Voice clinic?

0 No

1 Yes

999 I don't wish to answer

### **2015 and 2017 surveys**

Have you ever heard of the Sisters with a Voice programme?

0 No

1 Yes

999 I don't wish to answer

In the past 6 months have you attended the Sisters with a Voice clinic?

0 No

1 Yes

999 I don't wish to answer

## Unique Object Multiplier Methods Wristband receipt questions

| Q No | Question                                                                            | Responses                                                                                                                                                                                    | Instructions                            |
|------|-------------------------------------------------------------------------------------|----------------------------------------------------------------------------------------------------------------------------------------------------------------------------------------------|-----------------------------------------|
| A8a  | Have you received a wrist band with a Sisters with a Voice logo since January 2017? | Yes (1)<br>No (0)<br>No but I have seen it with others (2)                                                                                                                                   | If 1 go to A8b<br>SKIP: 0 or 2 go to A9 |
| A8b  | How many wrist bands have you received?                                             | Number pad                                                                                                                                                                                   | If 1 go to A8c<br>If >2 go to A8f       |
| A8c  | Where did you receive the wrist band?                                               | Site 1 [NAME REDACTED] (1)<br>Site 2 [NAME REDACTED] (2)<br>Site 3 [NAME REDACTED] (3)<br>Site 4 [NAME REDACTED] (4)                                                                         | go to A8d                               |
| A8d  | What month did you receive the wrist band?                                          | January (1)<br>February (2)<br>March (3)<br>April (4)                                                                                                                                        | go to A8e                               |
| A8e  | What was the colour of the wrist band?                                              | light blue (1)<br>navy blue (2)<br>pink (3)<br>orange (4)<br>green (5)<br>yellow (6)<br>red (7)<br>black (8)<br>other (9)<br>peach (10)<br>I don't know (88)<br>I don't wish to answer (999) | go to A9                                |
| A8f  | Where did you receive the first wrist band?                                         | Site 1 [NAME REDACTED] (1)<br>Site 2 [NAME REDACTED] (2)<br>Site 3 [NAME REDACTED] (3)<br>Site 4 [NAME REDACTED] (4)                                                                         | go to A8g                               |

|     |                                                   |                                                                                                                                                                                              |                           |
|-----|---------------------------------------------------|----------------------------------------------------------------------------------------------------------------------------------------------------------------------------------------------|---------------------------|
| A8g | What month did you receive the first wrist band?  | January (1)<br>February (2)<br>March (3)<br>April (4)                                                                                                                                        | <a href="#">go to A8h</a> |
| A8h | What was the colour of the first wrist band?      | light blue (1)<br>navy blue (2)<br>pink (3)<br>orange (4)<br>green (5)<br>yellow (6)<br>red (7)<br>black (8)<br>other (9)<br>peach (10)<br>I don't know (88)<br>I don't wish to answer (999) | <a href="#">go to A8i</a> |
| A8i | Where did you receive the second wrist band?      | Site 1 [NAME REDACTED] (1)<br>Site 2 [NAME REDACTED] (2)<br>Site 3 [NAME REDACTED] (3)<br>Site 4 [NAME REDACTED] (4)                                                                         | <a href="#">go to A8j</a> |
| A8j | What month did you receive the second wrist band? | January (1)<br>February (2)<br>March (3)<br>April (4)                                                                                                                                        | <a href="#">go to A8k</a> |
| A8k | What was the colour of the second wrist band?     | light blue (1)<br>navy blue (2)<br>pink (3)<br>orange (4)<br>green (5)<br>yellow (6)<br>red (7)<br>black (8)<br>other (9)<br>peach (10)<br>I don't know (88)<br>I don't wish to answer (999) | <a href="#">go to A9</a>  |

## Appendix 3: Workshop Outline

### **Population size estimation: overview and approaches to developing an estimate of the female sex worker population in Zimbabwe**

June 6th and 7th, 2017

Centre for Sexual Health and HIV/AIDS Research (CeSHHAR), Harare, Zimbabwe

#### Objectives

1. To review methods to estimate population sizes of marginalised populations such as female sex workers
2. To review female sex worker population size estimates (PSEs) for 20 sites across Zimbabwe
3. To use a facilitated process to discuss and agree methods for developing a national estimate of the number of female sex workers in Zimbabwe

#### Participants

Participants included programmers working with the Sisters with a Voice female sex worker programme run by CeSHHAR Zimbabwe, which provides peer education, outreach, community mobilisation and clinical services to sex workers at 36 sites around Zimbabwe; experts in Zimbabwe HIV epidemiology from across government agencies, international agencies, programmes and funders; and researchers (epidemiologists, statisticians) from CeSHHAR Zimbabwe and the Measurement and Surveillance of HIV Epidemics (MeSH) Consortium Key Populations Working Group.

#### **Facilitators:**

Frances M Cowan – Director, CeSHHAR Zimbabwe, Liverpool School of Tropical Medicine (LSTM) UK

Elizabeth Fearon- Epidemiologist, MeSH Consortium Key Populations Working Group, London School of Hygiene and Tropical Medicine (LSHTM) UK

Sungai T Chabata – Statistician, CeSHHAR Zimbabwe

#### **Attendees:**

Samson Chidiya – HIV Prevention Specialist, USAID Zimbabwe

Trust Chiguvare – Public Health Specialist Monitoring and Evaluation, CDC Zimbabwe

Elizabeth Gonese – Public Health Specialist HIV Surveillance, CDC Zimbabwe

Sitholubuhle Magutshwa – Social Scientist with Sisters with a Voice programme, CeSHHAR Zimbabwe

Victor Makaza – Monitoring and Evaluation Officer, National AIDS Council Zimbabwe

Matthews Maruva – Senior M&E Specialist, USAID Zimbabwe

Absolom Masendeke – RTI International, Zimbabwe

Tendai Mhaka – Key Populations Coordinator, National AIDS Council Zimbabwe

Mutsa Mhangara – USAID Zimbabwe

Tendayi Ndori-Mharadze – Programme Director: Key Populations, Manager of Sisters with a Voice Programme, CeSHHAR Zimbabwe

Brilliant Nkomo – Strategic Information Coordinator, Ministry of Health and Child Care Zimbabwe

Isaac Taramusi – Monitoring and Evaluation Coordinator, National AIDS Council Zimbabwe

## Agenda

### **Day 1: Overview of Population Size Estimation**

#### Morning

- Introductions and objectives
- Overview of Population Size Estimation: rationale, approaches, key issues

#### Afternoon

- PSE's of female sex workers at sites across Zimbabwe

### **Day 2: PSE for female sex workers in Zimbabwe and extrapolation to the national level**

#### Morning

- Planning a Population Size Estimation Study
- Overview of extrapolation methodologies
- Developing a national PSE of female sex workers in Zimbabwe:
  - Workshop

#### Afternoon

- Developing a national PSE of female sex workers in Zimbabwe:
  - Workshop
- Next steps and ways forward

### **Key decisions made:**

- How to summarise the size estimate for the twenty sites with direct PSEs where multiple methods were used
- Approach to extrapolating from these 20 sites to obtain a national population size estimate
- Develop a list of likely hotspot sites for female sex work around Zimbabwe. These were decided to be all those 36 sites with Sisters clinics, plus any additional sites estimated to have concentrations of female sex workers by the workshop attendees.
- Matching hotspots into strata of likely similarity of SW prevalence
- Estimate of the proportion of all female sex workers in Zimbabwe who would be found in one of the hotspot sites.

## Methods

The process for reaching decisions during the workshop was as follows. First, workshop attendees attended training on methods used to estimate population sizes, their strengths, weaknesses and uncertainties, estimates obtained from 20 sites in Zimbabwe, and methods used to extrapolate site estimates to the national level. Background and contextual information behind each decision was given, followed by an open discussion amongst all workshop attendees. The facilitators then asked participants to put forward suggestions- these were each discussed and debated, a consensus amongst workshop attendees was reached and participants were reminded of the decisions reached at regular intervals and at the end of the workshop. Particular attention was given to each participant's particular background and expertise.

When considering additional sites that could be hotspots for FSW around Zimbabwe, participants considered each province in turn and reviewed a map. Not all suggestions put forward were necessarily accepted by the group. When creating strata of hotspots considered to be similar to each other with respect to the likely prevalence of sex work among adult women (unknown for those sites without direct PSEs), a table of site classifications was projected so that participants could consult it. This included site names, provinces, primary and secondary classifications (often related to main economic industry: mining, tourism, border site, farming, fishing, army base, mining, rural growth-point) and male and female population from Census 2012. After a first list of groupings was reached, participants were asked to discuss and agree the groupings again before the groupings were finalised.

**Attachments:**

Slides used during the workshop (excluding those with names sites other than Harare and Bulawayo, decided to be too sensitive to report without anonymising sites) are included in Appendix 4.

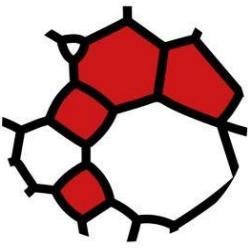

**MeSH Consortium**  
Measurement & Surveillance  
of HIV Epidemics

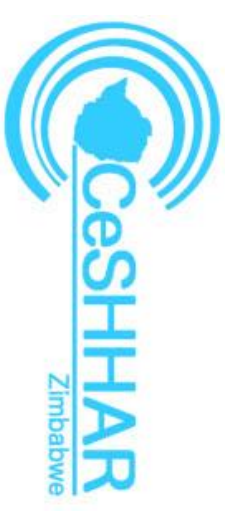

# Population Size Estimation

June 6<sup>th</sup> and 7<sup>th</sup>, 2017

Harare

Elizabeth Fearon, LSHTM

Sungai Chabata, CeSHHAR Zimbabwe

[www.mesh-consortium.org.uk](http://www.mesh-consortium.org.uk)

Frances Cowan, CeSHHAR Zimbabwe

# Agenda

## Day 1: Overview of Population Size Estimation

### Morning

- Introductions and objectives
- Overview of Population Size Estimation: rationale, approaches, key issues

### Afternoon

- PSE's of female sex workers in Zimbabwe
- Planning a Population Size Estimation Study exercise

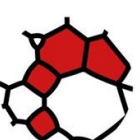



# Agenda

Day 2: PSE for female sex workers in Zimbabwe and extrapolation to the national level

- Overview of extrapolation methodologies
- Developing a national PSE of female sex workers in Zimbabwe:
  - Introduction
  - Workshop
- Next steps and ways forward

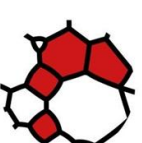

# Introductions

- Name, organisation, key responsibilities
- Why interested in population size estimation- how does it relate to your work?
- Review Agenda- anything to add?

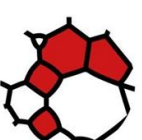



# Partners

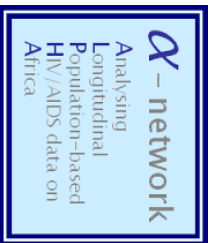

**LINKAGES**

Across the Continuum of HIV Services for Key Populations

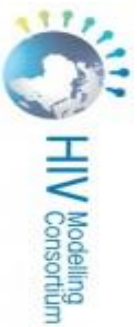

**UCSF**

University of California San Francisco  
advancing health worldwide

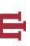

**RICHARD M. FAIRBANKS SCHOOL OF PUBLIC HEALTH**  
INDIANA UNIVERSITY  
Bloomington

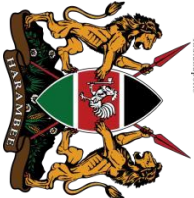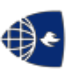

**JOHNS HOPKINS BLOOMBERG SCHOOL of PUBLIC HEALTH**

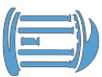

**THE UNIVERSITY of NORTH CAROLINA at CHAPEL HILL**

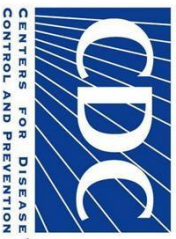

**BILL & MELINDA GATES foundation**

**LONDON SCHOOL of HYGIENE & TROPICAL MEDICINE**

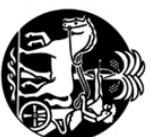

Joint United Nations Programme on HIV/AIDS  
**UNAIDS**  
UNHCR · UNICEF · WFP · UNDP · UNFPA  
UNODC · ILO · UNESCO · WHO · WORLD BANK

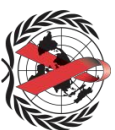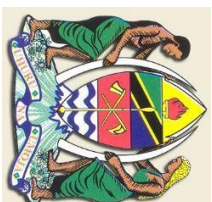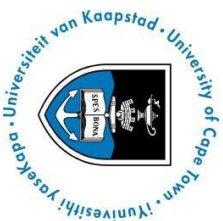

**SEARCH**

Sustainable Evaluation through Analysis of Routinely Collected HIV data

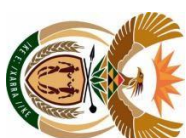

Investing in our future  
**The Global Fund**  
To Fight AIDS, Tuberculosis and Malaria

**U<sup>b</sup>**

UNIVERSITÄT BERN

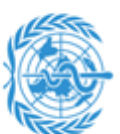

**World Health Organization**

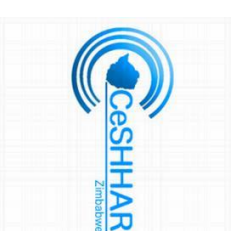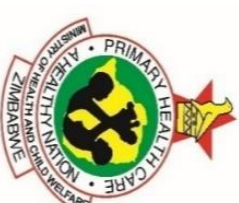

**NASTAD**  
NATIONAL ALLIANCE OF STATE & TERRITORIAL AIDS DIRECTORS

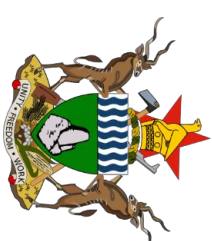

**IEDE**

**rbcc**  
RWANDA BIOMEDICAL CENTER

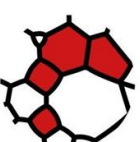

**MESH Cor**  
A Healthy People, A Wealthy Nation  
Measurement & Surveillance of HIV Epidemics

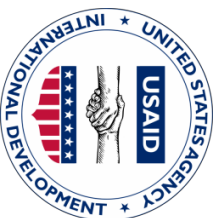

# Partners

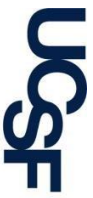

University of California  
San Francisco  
*advancing health worldwide*

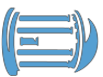

THE UNIVERSITY  
of NORTH CAROLINA  
at CHAPEL HILL

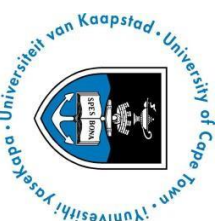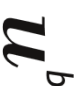

JOHNS HOPKINS  
BLOOMBERG SCHOOL  
of PUBLIC HEALTH

LONDON  
SCHOOL of  
HYGIENE  
& TROPICAL  
MEDICINE

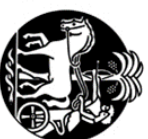

UNIVERSITÄT  
BERN

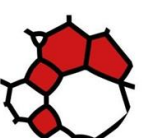

**MeSH Consortium**  
Measurement & Surveillance  
of HIV Epidemics

# MESH structure

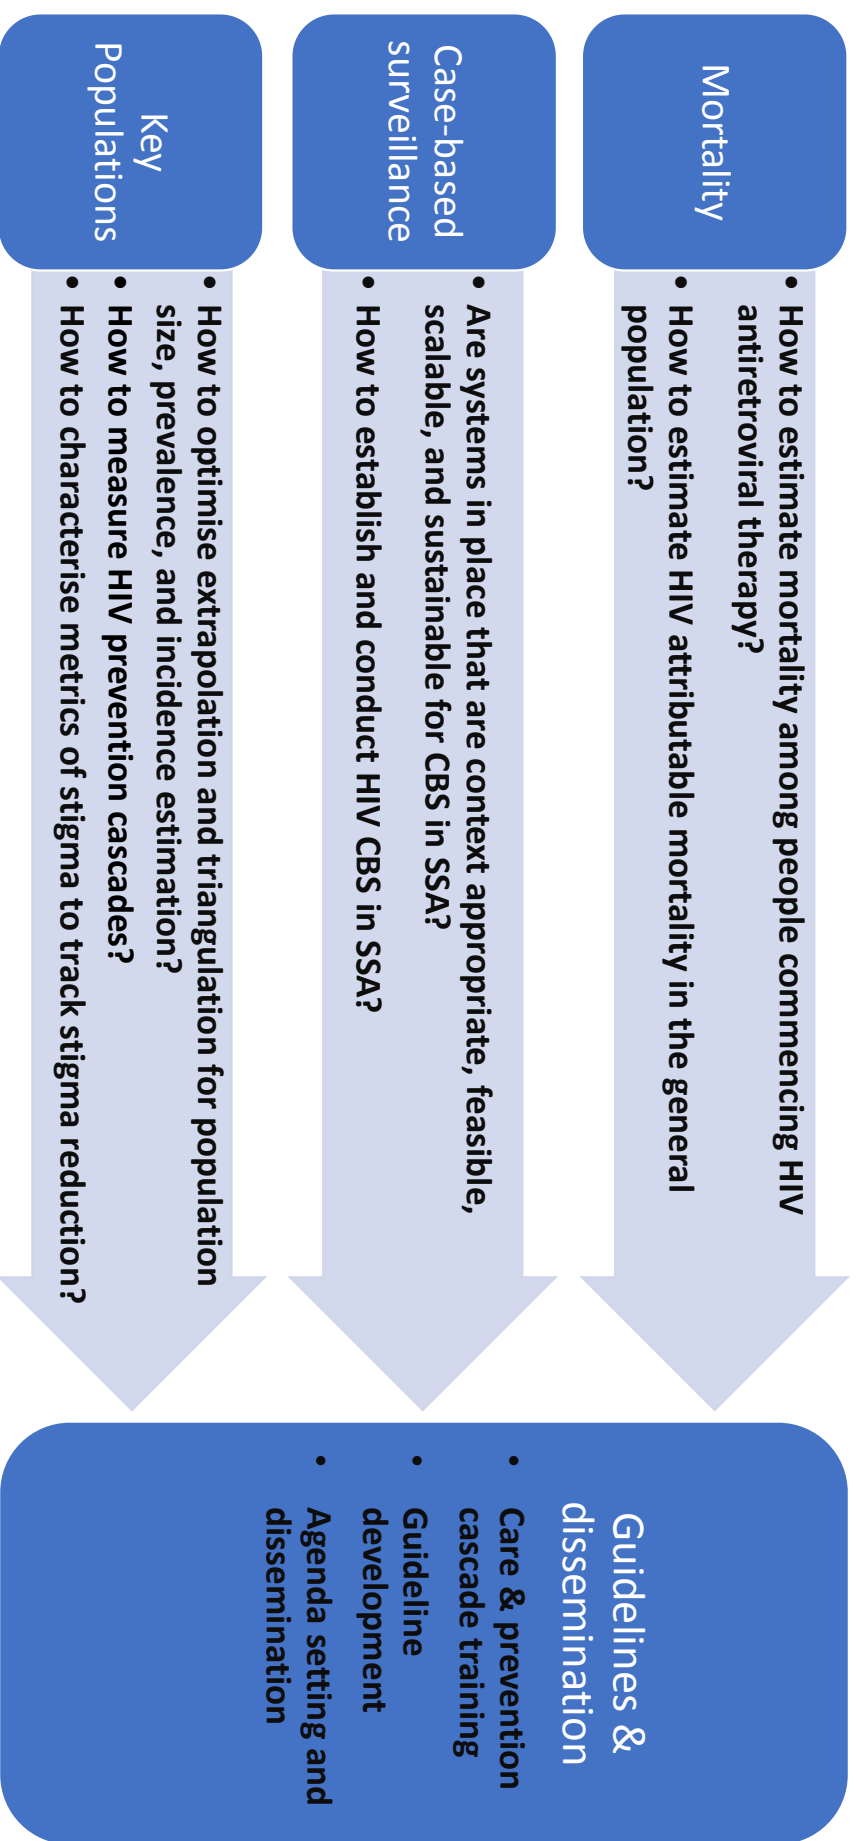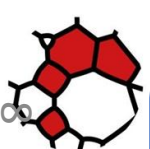

## **Working Group 3: among key populations estimate size and location, prevention and treatment coverage, and prevalence and incidence**

- **Extrapolation and Triangulation**  
Use observed direct estimates plus contextual data (available from all areas) to learn about areas without direct estimates
- **Prevention cascades**
- **Metrics to track progress on stigma**

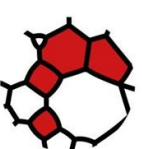

# Introductions

Name, organisation, role

Why interested in population size estimation- how does it relate to your work?

Review Agenda- anything to add?

- Do you currently use estimates of the size of key populations in your work?
- Where do these estimates come from?
- How much do you trust these estimates? How important is it that the estimates are very accurate?



**MeSH Consortium**  
Measurement & Surveillance  
of HIV Epidemics



# Population Size Estimation: Overview

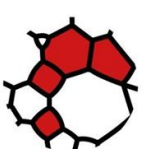

**MeSH Consortium**  
Measurement & Surveillance  
of HIV Epidemics

# What populations are we talking about?

## HIV risk context

Do not appear in a census or difficult to sample

- Problems with self-reporting -> social stigma, marginalised populations, criminalised populations
- Mobile populations, across geographies
- Mobile definition, across time (eg moving in and out of periods of risk)



# Why do we want to estimate the number of sex workers at sites, regions and countries?

- Service delivery targeting and planning
  - What populations are at high risk of HIV?
  - Where do services need to be located?
- Programme monitoring ('denominator')
  - Provide a 'denominator' for services uptake
  - Use routinely collected data to estimate programme coverage and evaluate reach
- Epidemic prediction
  - Input estimates into models such as SPECTRUM
- Allocation of funding
- Advocacy

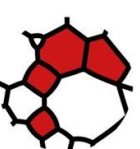

# Methods for Population Size Estimation

- Literature review
- Mapping methods: census and enumeration
- Multiplier methods
- Population survey methods
- New approaches



# Methods for Population Size Estimation

- Literature review
- Mapping methods: census and enumeration
- Multiplier methods
- Population survey methods
- New approaches

No 'gold  
standard'





# Methods: Wisdom of the crowd

How many female  
sex workers do you  
think there are in  
this town?

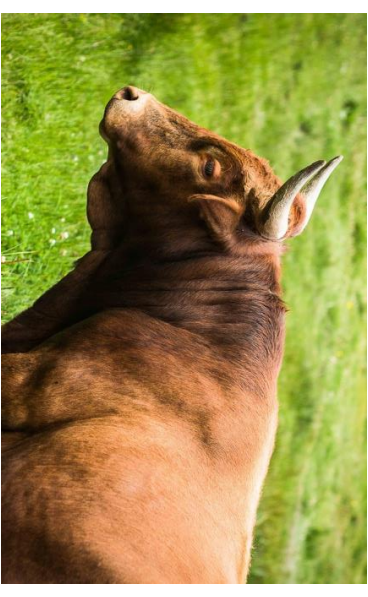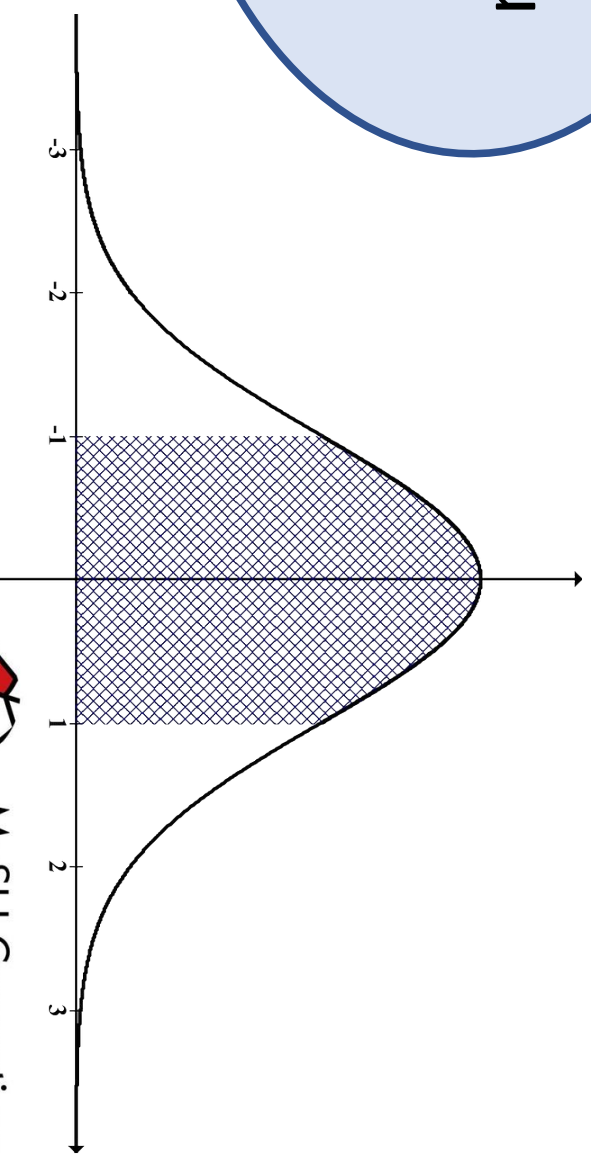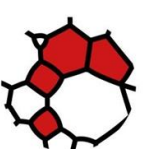

**MeSH Consortium**  
Measurement & Surveillance  
of HIV Epidemics

# Methods: Wisdom of the crowd

## Strengths

- Easily added to a survey
- Special knowledge
- If ask a large group, less likely to be affected by outliers

## Weaknesses

- Everyone might have the same tendency to be wrong (systematic bias)
- Think about size of site
- Segregated population





# Mapping Methods: Census and Enumeration

Construct map of where the population congregates

- Key informants, peer educators, focus groups

Census: use map as a tool to count ALL members of the population

Enumeration: use map as a sampling frame to select venues; count all of the population in the sampled venues and extrapolate to all venues.

- Stratify venues, apply averages to strata
- Time/place

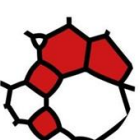

# Mapping Methods: Census and Enumeration

## Strengths

- Provides a minimum number
- Easy to understand and communicate
- Good check alongside other methods

## Weaknesses

- Miss members of population not at these venues
- Need to consider time/space
- Very time intensive for large sites



# Methods: Multiplier Methods

Uses two sources of data

1. Register or count of the target population (received service, visited programme, received token) -> **M**
2. Representative survey of the target population -> **P**

$$N \approx M/P$$



# Service Multiplier Method

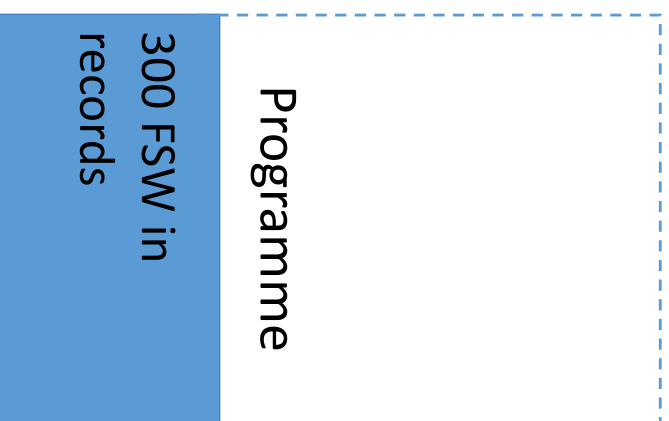

# Service Multiplier Method

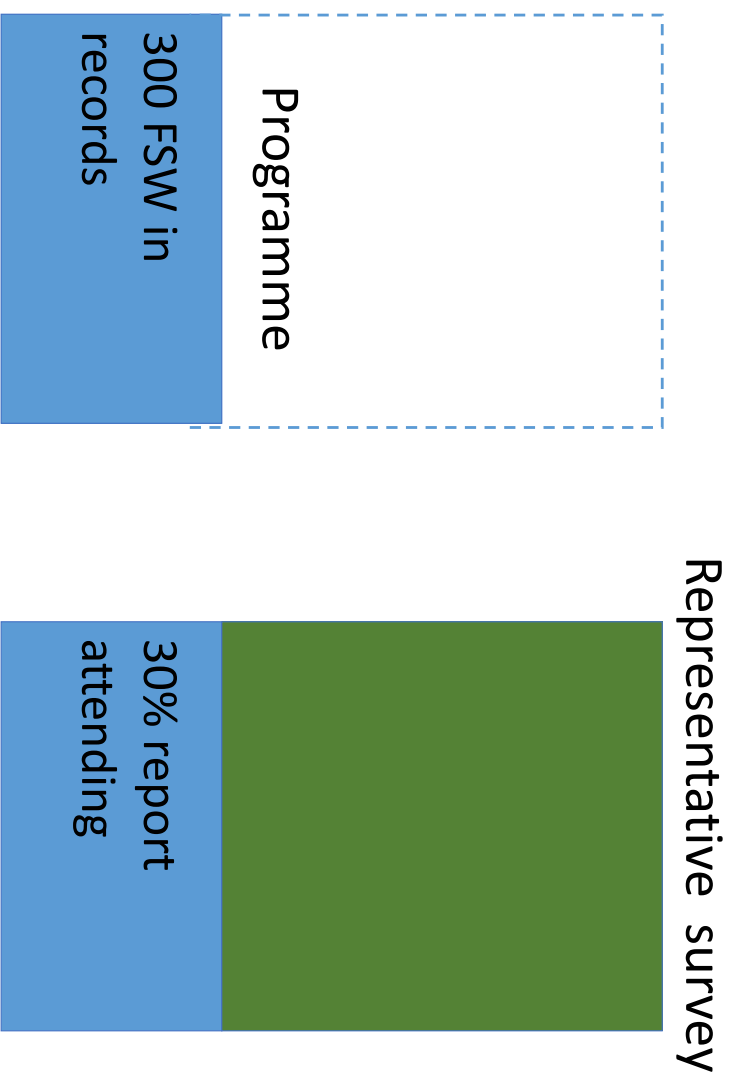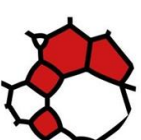

# Service Multiplier Method

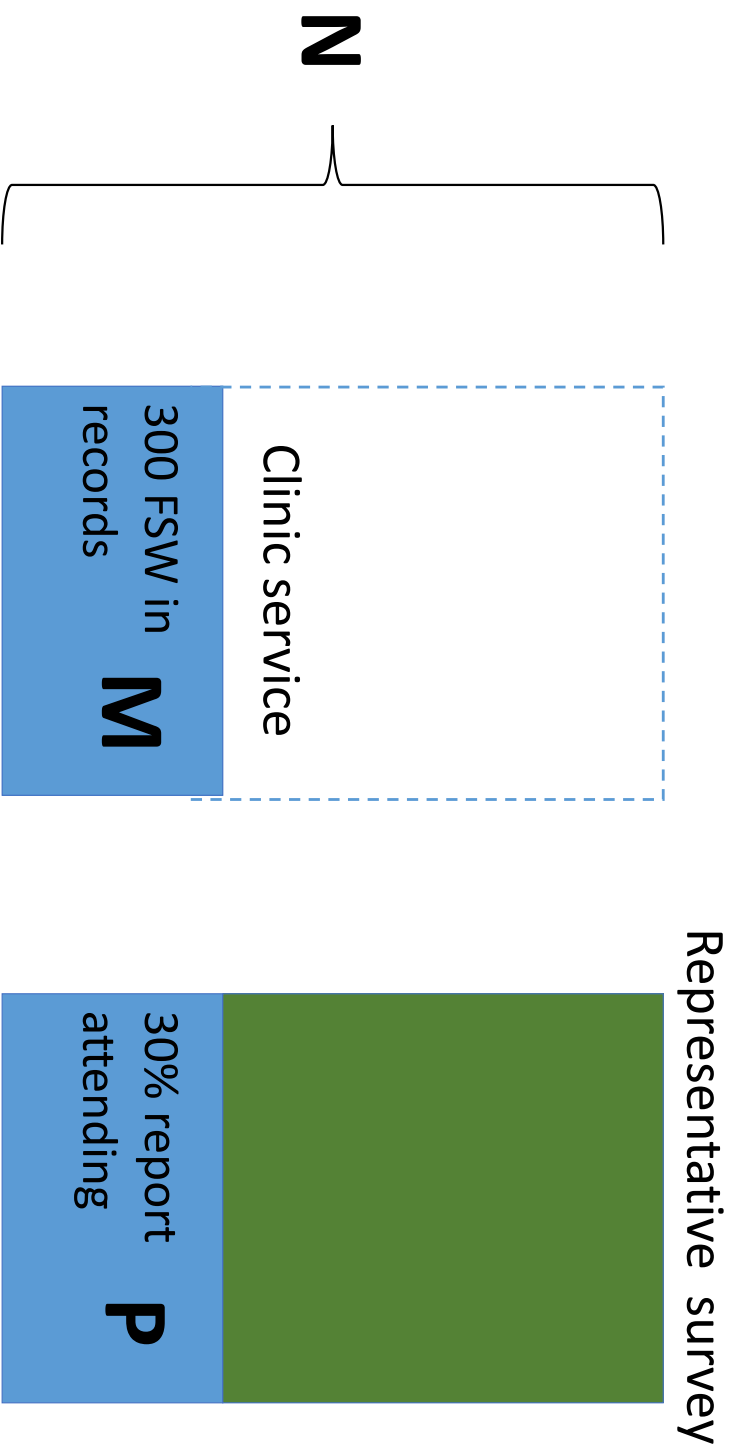

$$N = M / P$$

$$1000 = 300 * 1 / 0.3$$

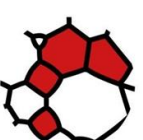

# 'Unique Object' Multiplier Method

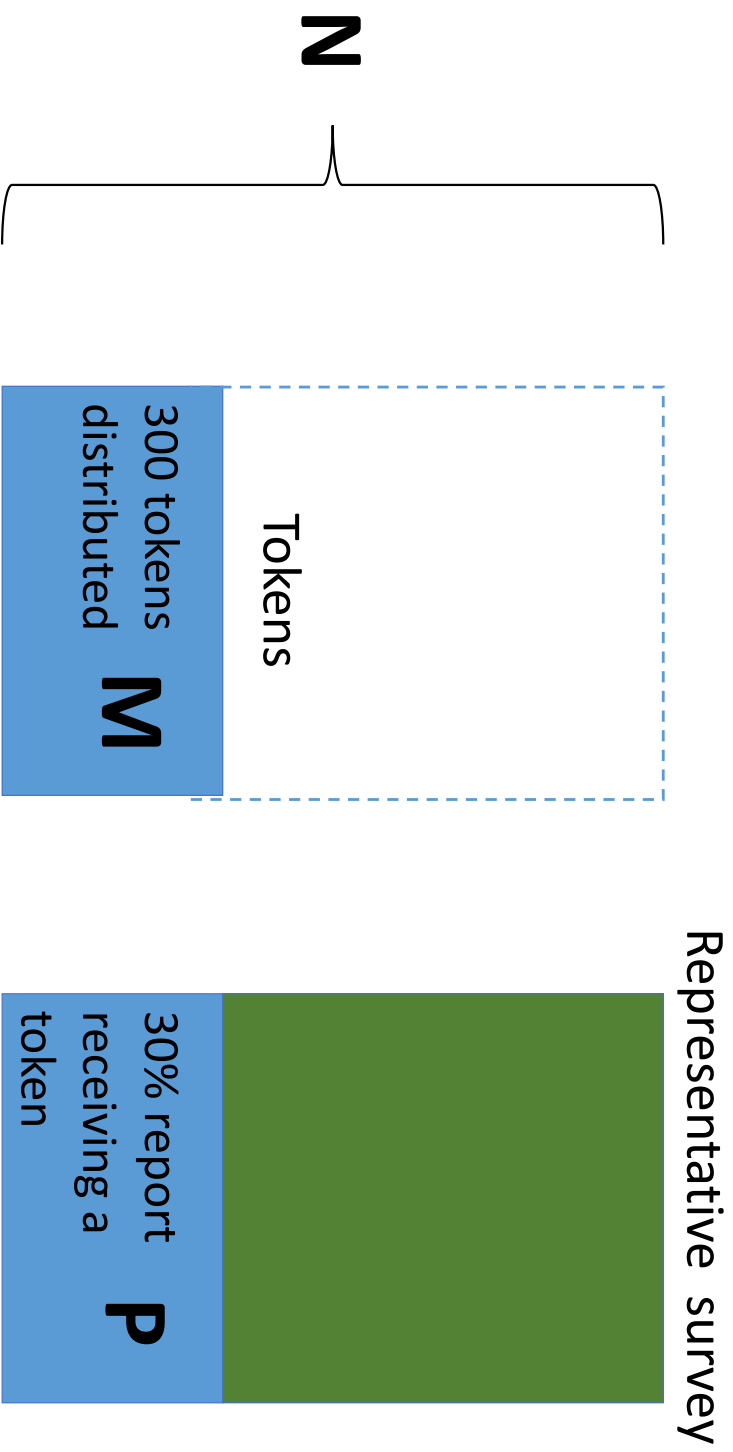

# Multiplier Method: Other multipliers

- Membership of community groups, social clubs
- Membership of social networking sites (if can get list)
  - Online dating profiles
  - Facebook groups
  - What's App groups
- Attendance at population-specific events
- Arrest data (where applicable)





# Multiplier Method: Assumptions

1. All members of the population being counted should have a **non-zero probability of being included** in both data sources.
2. Individuals should **not be counted more than once** in each data source.
3. The two data sources should be **independent** of each other.
4. The representative data source should be a **random sample** of the target population.



# Multiplier Method

## Strengths

- Simple calculation
- Use existing service data
- Survey questions relatively easy/low burden

## Weaknesses

- Can give very variable results
- High uncertainty
- Independence of data sources challenging in practice
- Inconsistencies in population definition



# Methods: Capture Re-Capture

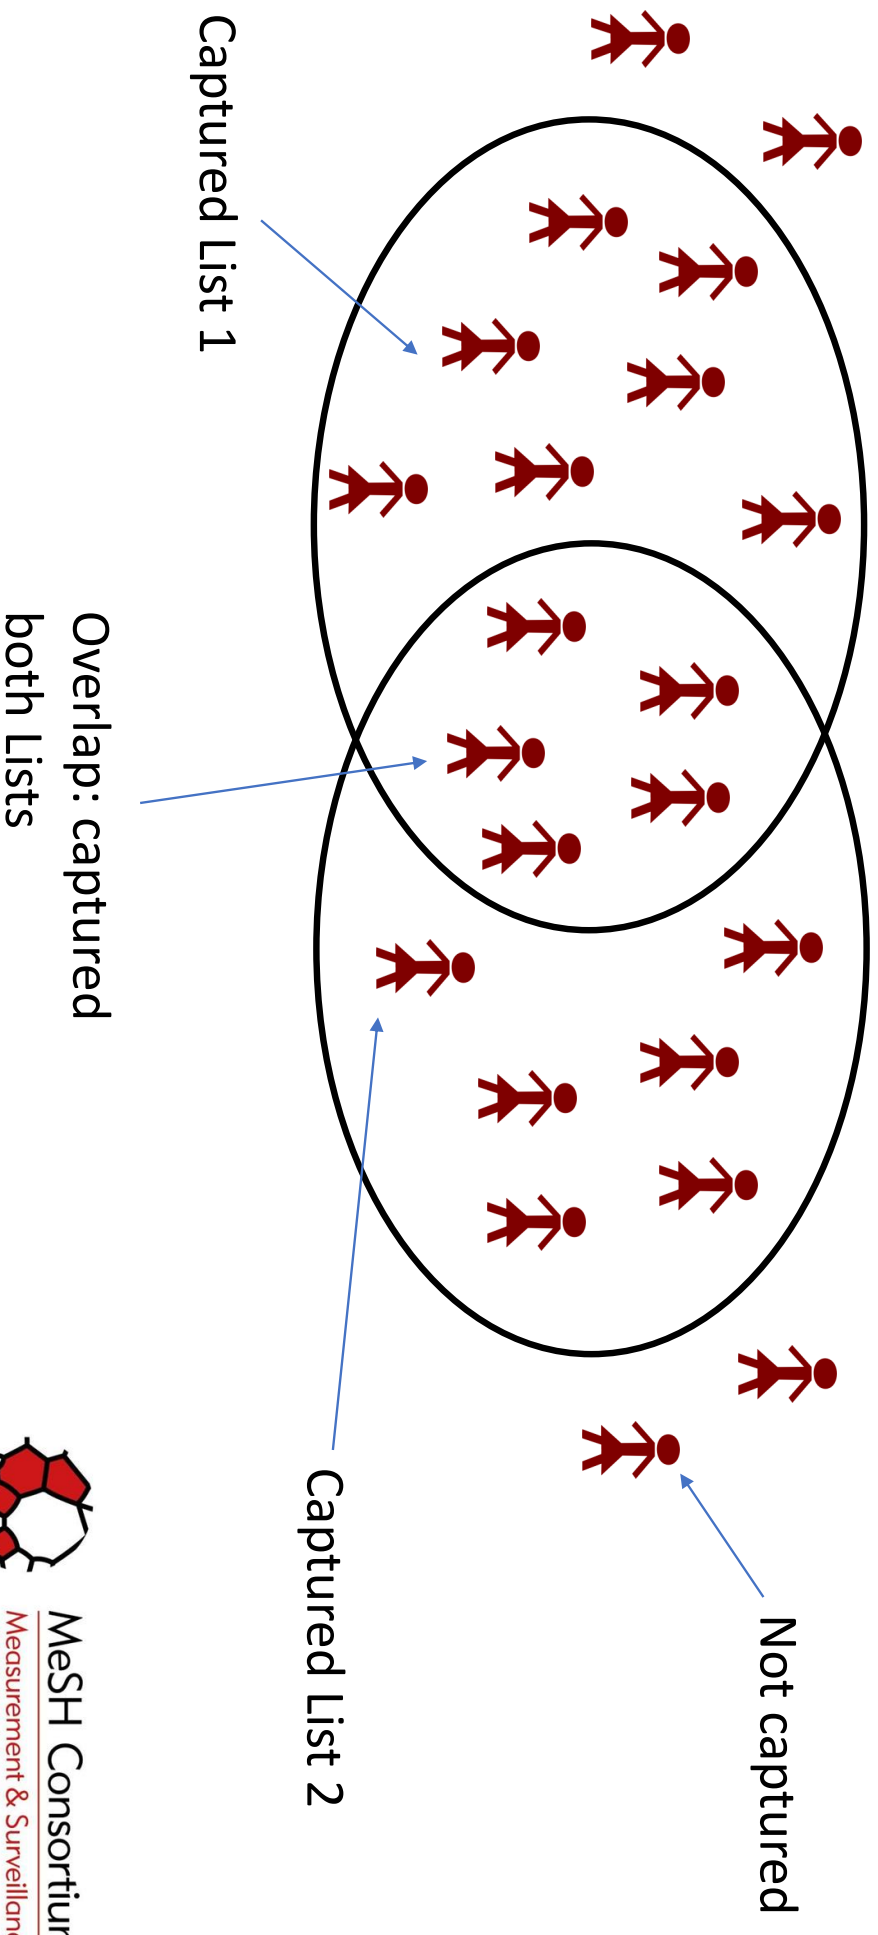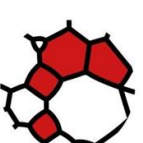

# Methods: Capture Re-Capture

$$N = \frac{\text{Captured List 1} \times \text{Captured List 2}}{\text{Overlap Captured both lists}}$$



# Methods: Capture Re-Capture

## Strengths

- Simple calculation
- Less time-intensive than census and enumeration
- No representative survey required
- Recommend multiple captures

## Weaknesses

- Misses those not present at venues
- Difficult to meet assumptions in practice:
  - Two 'captures' must be independent
  - Identify individuals accurately



# Population Surveys: asking about behaviours

- Question to define population in representative population survey
- Lifetime behaviour
- Recent behaviour



# Population Surveys: asking about behaviours

## Strengths

- Provides estimates at different levels (given power) or at least a framework for extrapolation
- Provides other information about the population

## Weaknesses

- Statistical power
- Social desirability bias
- Question to define population
- Likelihood of inclusion in survey
- Time (ever/now)



# Population Surveys: Network Scale-Up

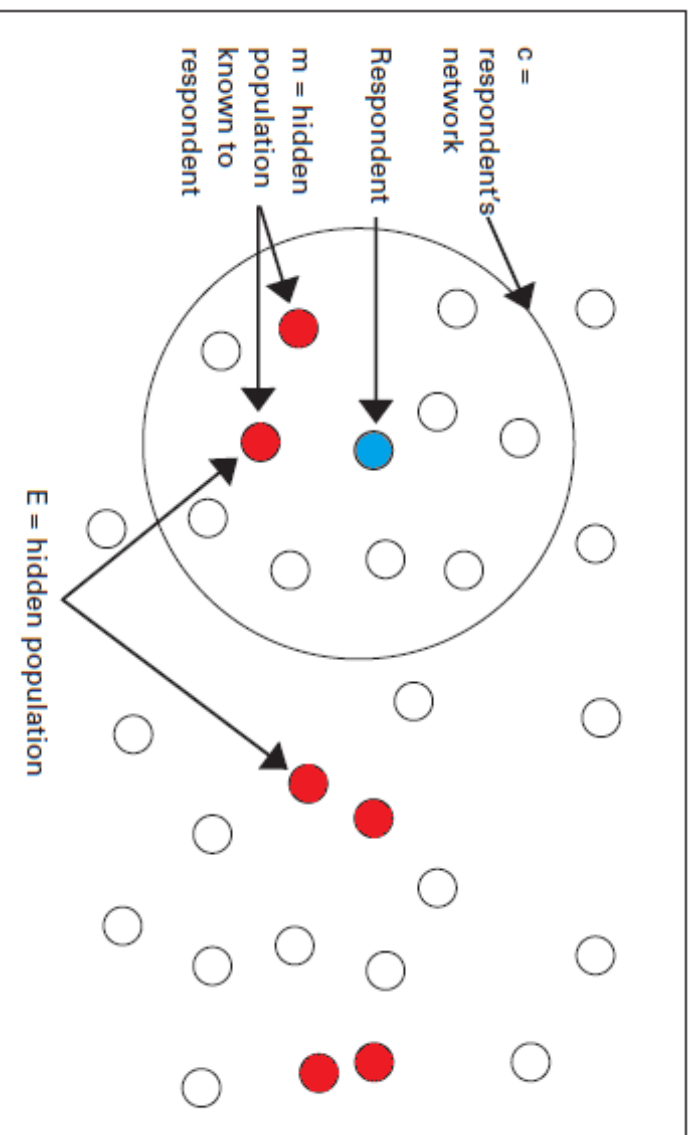

Proportion of hidden population members in the total population can be estimated from the proportion within the personal networks of a random sample of the population.

$$m/c = e/t$$

Obtainable from a population survey.

Shokoohi M, Baneshi MR, Haghdoost AA. Size Estimation of Groups at High Risk of HIV/AIDS using Network Scale Up in Kerman, Iran. *Int J Prev Med.* 2012;3(7):471-6.



**MeSH Consortium**  
Measurement & Surveillance  
of HIV Epidemics



# Network Scale-Up Assumptions

- Members of population are known to be members  
**No transmission bias**
- Equal network size between members and non-members  
**No popularity bias**
- Random mixing or even distribution of populations  
**No barrier effect**
- Reporting is accurate  
**No reporting bias**



# Network Scale-Up

## Strengths

- Improved 'sample size'
- No self-report
- Methods in development, lots of interest

## Weaknesses

- Assumptions difficult to meet
- Personal network size difficult to measure
- Transmission bias likely-> 'Game of Contacts'



# Methods: RDS-Successive Sampling

- Based on theoretical decline in network size over sampling wave
- Imputed 'network visibility'
- Bayesian framework

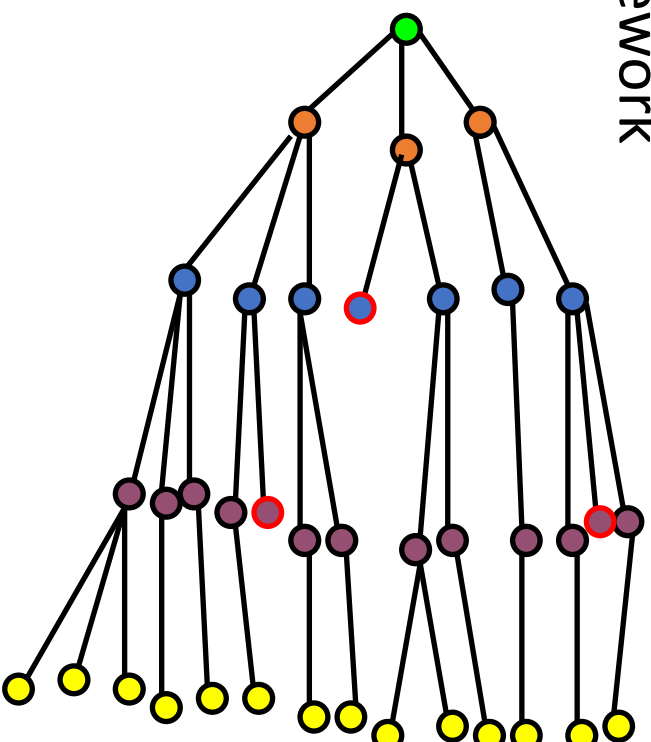

# RDS-Successive Sampling

## Strengths

- Requires only an RDS survey (though better with additional estimates to compare, inform prior)
- Framework for synthesising estimates?

## Weaknesses

- Assumptions about degree decay over sample waves
- New method: little tested in practice so far



# Issues with population size estimation

- No gold standard method
- All methods prone to bias
- Widely variable depending on method
- Definition of the population
- Fluctuations over time: migrations, moving in and out of risk
- Extrapolation to different level (usually site to national level)
- Difficulty assessing time trends



# High variability

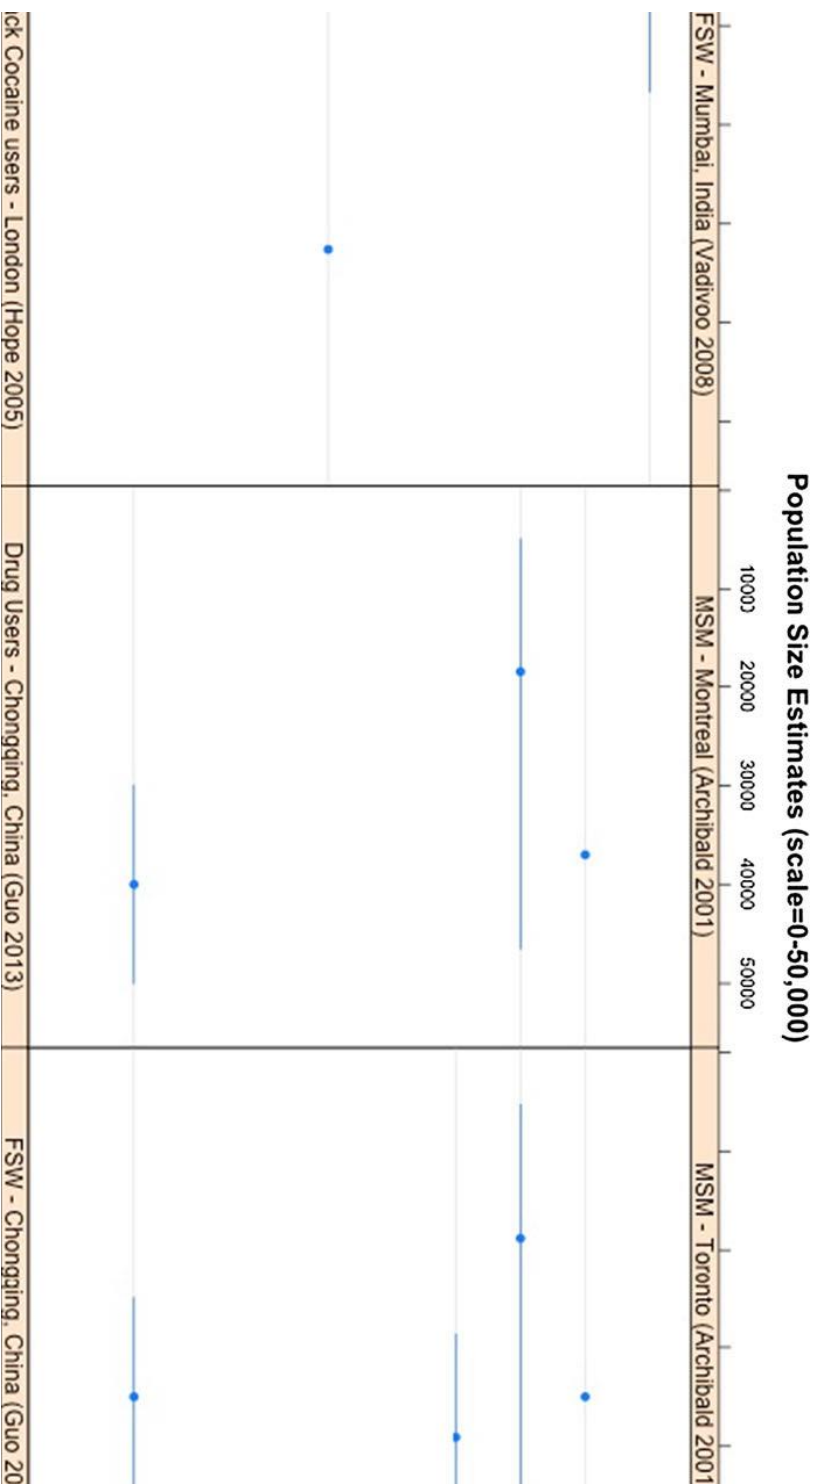

Wesson P, Reingold A, McFarland W. Theoretical and Empirical Comparisons of Methods to Estimate the Size of Hard-to-Reach Populations: A Systematic Review. AIDS Behav. 2017.



**MeSH Consortium**  
Measurement & Surveillance  
of HIV Epidemics

# Sources of uncertainty

- Random error: wide confidence intervals
  - Sample size calculations
- Assumptions of methods difficult to meet in practice -> biases
  - Some assumptions can be investigated (Chabata et al)
- Combining estimates from different methods
- Extrapolation method or lack thereof

→ lack of certainty should be reflected in how PSE's are used



# Systematic biases by method

- Systematic review found 341 published KP size estimates, 25 had multiple methods for side by side comparison
- No evidence of “best” method, all could be biased up or down by theory or observation
  - Literature tends to the middle
  - Wisdom of the crowd tends to be low
  - Delphi tends to the middle
  - Mapping estimates tend to be low
- Multiplier methods and capture-recapture estimates can be wildly high or low

Wesson P, Reingold A, McFarland W. Theoretical and Empirical Comparisons of Methods to Estimate the Size of Hard-to-Reach Populations: A Systematic Review. AIDS Behav. 2017.



**MeSH Consortium**  
Measurement & Surveillance  
of HIV Epidemics



# Triangulation and Synthesis

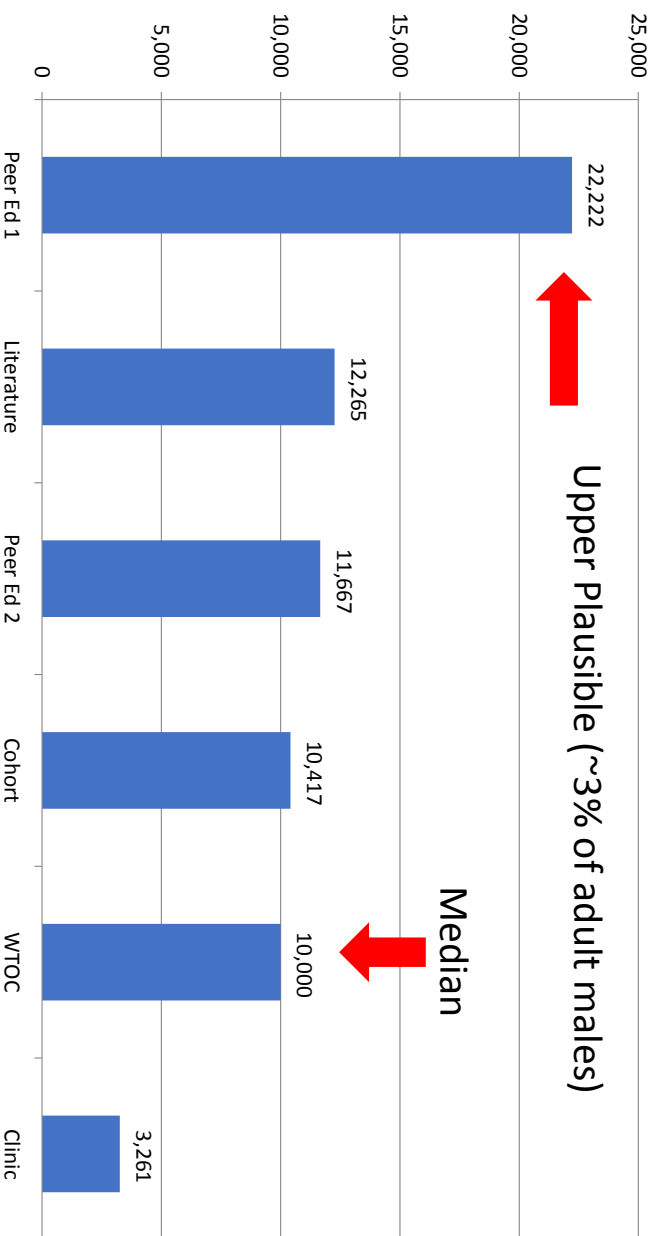

MSM population size estimates, median and plausibility bounds,  
Nairobi, 2010.

Okal J, Geibel S, Muraguri N, Musyoki H, Tun W, Broz D, et al. Estimates of the size of key populations at risk for HIV infection: men who have sex with men, female sex workers and injecting drug users in Nairobi, Kenya. Sex Transm Infect. 2013;89(5):366-71



# Plausibility

- Minimum estimates
  - Census
  - Population Service data (eg attendance at sex worker's clinic)
- Maximum estimates
- Comparison to other settings
- Relative plausibility: Site A versus Site B



# Recommendations

For those conducting size estimations:

- Use multiple methods, triangulation
- Sample size calculations for survey-based methods (this afternoon)
- Use and explain a principled method for extrapolation (tomorrow)

For those using population size estimates:

Use upper and lower plausibility bounds- do not rely on point estimate



# Discussion

Do you think the way in which population size estimates are used currently reflects the uncertainty around them?



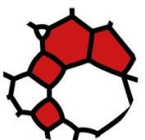

**MeSH Consortium**  
Measurement & Surveillance  
of HIV Epidemics



**MeSH Consortium**  

---

**Measurement & Surveillance  
of HIV Epidemics**

# Planning a Population Size Estimation Study

[www.mesh-consortium.org.uk](http://www.mesh-consortium.org.uk)

# Who is the population?

- Behaviours versus people
- Periods of risk
- Place/mobility questions
- Seasonality



# Defining your site

- What are the boundaries?
- Does your population reside there permanently or temporarily?
- Do you intend to update findings again in the future?
- Do you intend to use your findings to extrapolate to another site?





# Choosing appropriate methods

- What are the estimates for?
- Characteristics of the population- venued based? Well ‘networked’?
- Existing data, resources for new data collection
- Size of site(s)
- Levels of representativeness (small truck stop, town, city, country)



# Stakeholder involvement

- Who are the estimates of benefit to?
- Who can help you understand your population?
  - Representatives from your population of interest
  - National/regional government
  - Programme planners, service providers, NGO's
  - Others with data



# Ethics

- Vulnerable, often criminalised populations
- Security around mapping
- Identification via unique objects, RDS coupons
- Publication of site names and numbers? (Feedback)
- Benefit to whom?



# Communication of Findings

- Incentives to choose higher or lower figures
- Ethics and communication of findings
- How to communicate uncertainty in estimates



# Sample Size Calculations

- Decisions about surveys
  - Population-based surveys
  - Target population surveys: Respondent Driven Sampling, Time/Location
- Decisions about multipliers
  - (eg no. unique objects distributed)
- Decisions about captures
- Mapping decisions, sites within strata
- Extrapolate to regional/national level estimate?



# Sample Size for Multiplier Method Studies with RDS

- Important to obtain estimates with reasonable precision for study aims (random variation), lack of current guidance
- Estimate P (proportion using service) using RDS survey, ( $N=M/P$ )
- Higher variance in RDS surveys than in a simple random sample survey, Design Effects (DEFF's) of 2-4 or higher
- Using Delta method combining variance in M and P, estimate effect of sample size on the width of 95% Confidence interval for different assumed values of M and P

Featon E, Chabata S, Thompson J, Cowan FM, Hargreaves JR. Sample size calculations for population size estimation studies using multiplier methods with respondent driven sampling surveys. Submitted 2017.



**MeSH Consortium**  
Measurement & Surveillance  
of HIV Epidemics

# Example: Sample Size for PSE of female sex workers in Harare

Table 1: Number of FSW attending the Sisters programme and effect on P, given the total population of FSW 15,000 in Harare (mid-point estimate based on literature, Vandepitte 2006)

| Reference Period, to April 23, 2015 | Number of Unique FSW Visiting, M | Estimated P, assuming population = 15,000 |
|-------------------------------------|----------------------------------|-------------------------------------------|
| 1 month                             | 85                               | 0.006                                     |
| 3 months                            | 560                              | 0.037                                     |
| 6 months                            | 952                              | 0.063                                     |
| 12 months                           | 1542                             | 0.103                                     |
| 24 months                           | 2227                             | 0.148                                     |

*Sisters programme clinic visit data up to April 2015*



Figure 1: Effect of reference period on P, width of the 95% CI around the PSE and sample size required for estimating the number of FSW in Harare

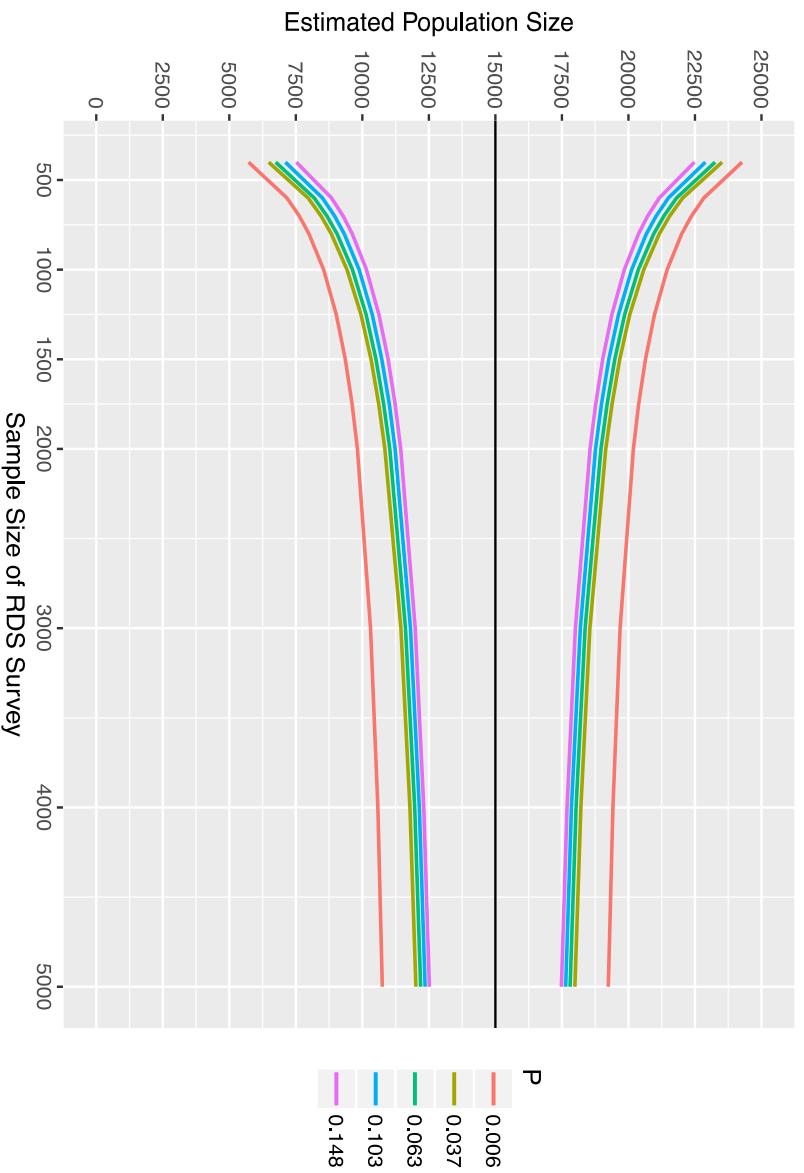

Fearon E, Chabata S, Thompson J, Cowan FM, Hargreaves JR. Sample size calculations for population size estimation studies using multiplier methods with respondent driven sampling surveys. Submitted 2017.







**MeSH Consortium**  
Measurement & Surveillance  
of HIV Epidemics

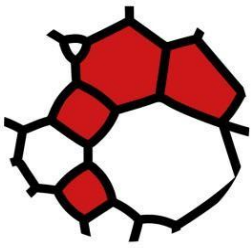

**MeSH Consortium**  
Measurement & Surveillance  
of HIV Epidemics

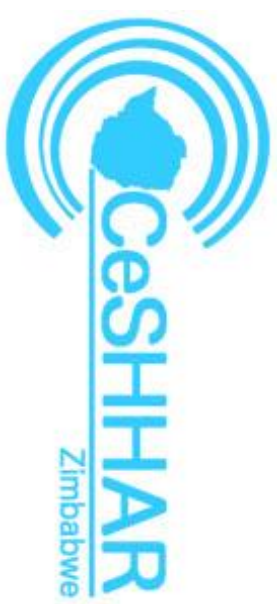

# Developing a National Estimate of the Number of Female Sex Workers in Zimbabwe

[www.mesh-consortium.org.uk](http://www.mesh-consortium.org.uk)

# Approaches to Extrapolation in other settings

- Assume exchangeability: prevalence from sampled sites = prevalence non-sampled sites
- Stratification: urban/rural, regional, type of sites (tourist, mining, truck-stop, etc)
- Matching
- Regression-based approaches
  - Model to correlate FSW prevalence with other district co-variates
  - Model for district sampling probabilities
- Bayesian models

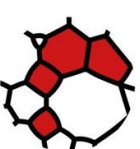

# Review of PSE's for Key Populations in LMIC's 2010-2016

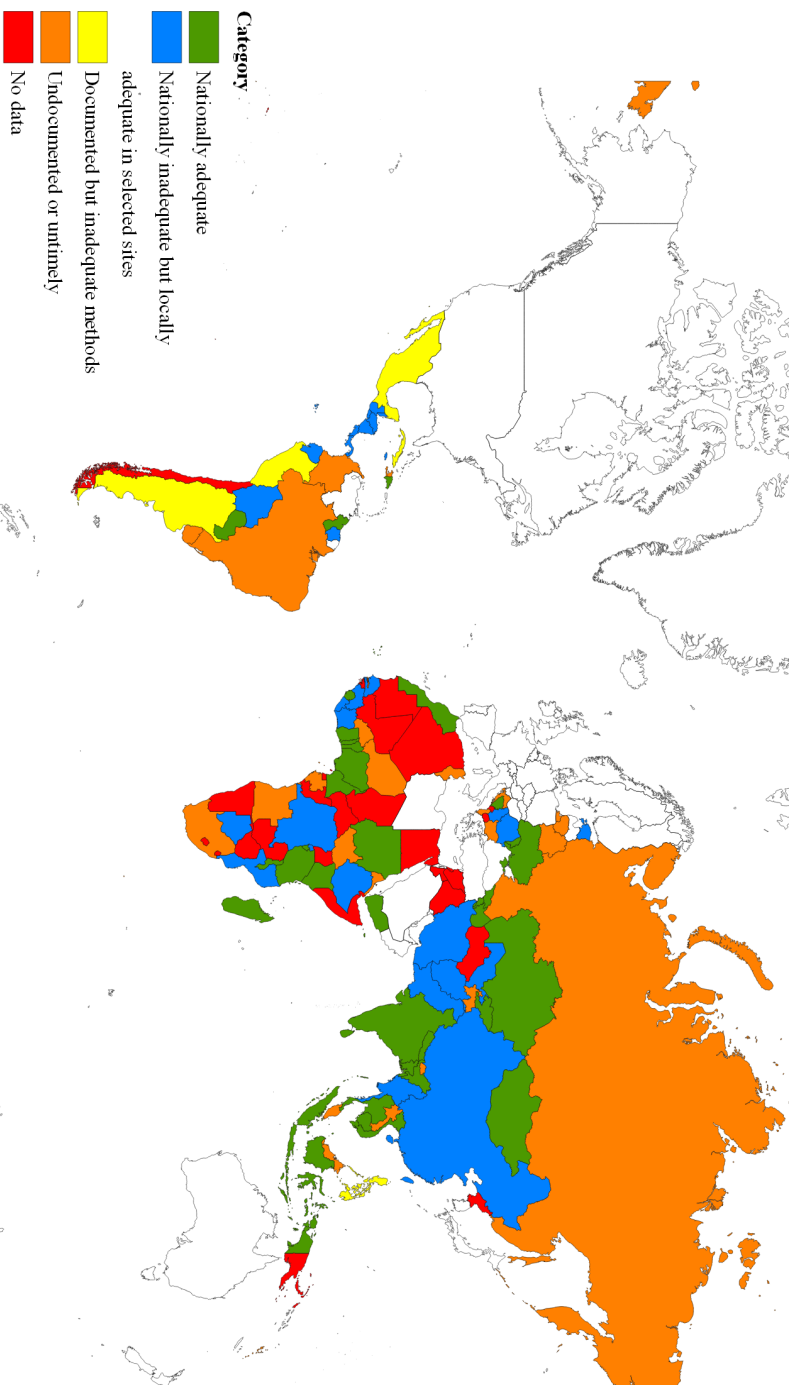

Fig 1. Categorization of population size estimates of female sex workers, men who have sex with men, people who inject drugs, and transgender women in low- and middle-income countries, 2010–2014.

Sabin K, Zhao J, Garcia Calleja JM, Sheng Y, Arias Garcia S, Reinisch A, et al. Availability and Quality of Size Estimations of Female Sex Workers, Men Who Have Sex with Men, People Who Inject Drugs and Transgender Women in Low- and Middle-Income Countries. *PLoS One*. 2016;11(5):e0155150.



**MeSH Consortium**  
Measurement & Surveillance  
of HIV Epidemics

1. **Nationally adequate:**
  - PSE's derived using 1) multiplier; 2) capture –recapture; 3) mapping/enumeration; 4) Network scale-up or population survey; 5) RDS-SS
  - National-level estimates or extrapolated from multiple sites with a “clear approach” to extrapolation
  - Two key population groups
2. **Nationally inadequate but locally adequate in selected cities**
  - PSE's derived using 1) multiplier; 2) capture –recapture; 3) mapping/enumeration; 4) Network scale-up or population survey; 5) RDS-SS
  - Estimates are only from sites where targeted programs are available but are insufficient for national program use.
  - Two key population groups
3. **Documented estimates but inadequate methods**
  - estimates are derived from 1) expert opinions; 2) Delphi; 3) wisdom of crowds; 4) programmatic results or registry or 5) regional benchmarks.
  - Estimates may or may not be national
4. **Undocumented or untimely:** estimates are reported but not documented or were derived prior to 2010.
5. **No data:** no size estimates are reported

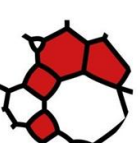

**Table 2. Application of methods in estimating population size estimates for female sex workers (FSW), men who have sex with men (MSM), people who inject drug (PWID) and transgender women in low- and middle-income countries, 2010–2014.**

| <b>Methods</b>                                                      | <b>FSW</b> | <b>MSM</b> | <b>PWID</b> | <b>Transgender women</b> |
|---------------------------------------------------------------------|------------|------------|-------------|--------------------------|
| Multiplier                                                          | 29         | 31         | 23          | 2                        |
| Capture re-capture                                                  | 19         | 17         | 11          | 2                        |
| Census & enumeration                                                | 19         | 10         | 3           | 1                        |
| Programmatic mapping                                                | 27         | 23         | 12          | 9                        |
| Network scale up method or population-based survey                  | 4          | 11         | 9           |                          |
| RDS-SS successive sampling                                          | 2          | 3          | 2           |                          |
| Administrative registry/programmatic results                        | 2          | 1          | 1           | 1                        |
| Regional benchmark                                                  | 3          | 7          | 2           | 1                        |
| Population-based survey                                             | 1          | 5          | 4           |                          |
| Expert opinion (wisdom of crowds/literature/ Delphi/key informants) | 13         | 10         | 7           | 2                        |
| Wisdom of crowds                                                    | 6          | 10         | 3           |                          |
| Not Reported                                                        | 9          | 6          | 6           | 2                        |
| Total number of countries                                           | 87         | 88         | 53          | 17                       |

Sabin K, Zhao J, Garcia Calleja JM, Sheng Y, Arias Garcia S, Reinisch A, et al. Availability and Quality of Size Estimations of Female Sex Workers, Men Who Have Sex with Men, People Who Inject Drugs and Transgender Women in Low- and Middle-Income Countries. *PLoS One*. 2016;11(5):e0155150.



# Classification of extrapolation approaches, Sabin et al 2016

1. Proportion of adult males or females: national estimates are calculated based on a proportion or a range of proportions of adult males or females, who are key population community members.
2. Summed up: national estimate is the sum of site-specific estimates with no adjustment.
3. Regression or probability formula: regression models were used to estimate populations in areas without an estimation exercise using information from those areas where estimations are available.
4. Based on one selected number: national estimate is extrapolated based on one estimate among a number of estimated numbers.
5. Delphi or consensus: a formal process considering different factors to arrive at an estimate.
6. No extrapolation.



**Table 5. Approaches used for extrapolations to national population size estimates in countries with known estimation methods for female sex workers (FSW), men who have sex with men (MSM), people who inject drug (PWID) and transgender women in low- and middle-income countries, 2010–2014.**

| <b>Approaches for extrapolations</b>                 | <b>FSW</b> | <b>MSM</b> | <b>PWID</b> | <b>Transgender women</b> |
|------------------------------------------------------|------------|------------|-------------|--------------------------|
| Proportion of adult population                       | 21         | 30         | 10          | 4                        |
| Based-on one selected estimate                       | 4          | 2          | 4           |                          |
| Summed up from site-specific results                 | 8          | 7          | 4           | 1                        |
| Regression or models                                 | 9          | 13         | 6           | 4                        |
| Delphi/consensus                                     | 6          | 5          | 5           | 1                        |
| <b>Total number of countries with extrapolations</b> | <b>58</b>  | <b>57</b>  | <b>29</b>   | <b>10</b>                |

Sabin K, Zhao J, Garcia Calleja JM, Sheng Y, Arias Garcia S, Reinisch A, et al. Availability and Quality of Size Estimations of Female Sex Workers, Men Who Have Sex with Men, People Who Inject Drugs and Transgender Women in Low- and Middle-Income Countries. *PLoS One*. 2016; 11(5):e0155150.

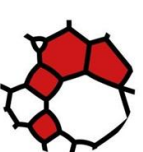



# Information in Zimbabwe to develop a National PSE for Female Sex Workers

We have a lot of high quality data:

- 20 sites with direct PSE's, most with more than one method (+RDS surveys and programme data)
- 16 sites with in-depth programme data
- Coverage across the country
- 2012 Census
- National surveys, ZIMPHIA

How shall we use this to develop a national PSE?



Supplement: qai-85-30-s001.pdf [file qai-85-30-s001.pdf]
